1 **TITLE: Live-Cell Imaging Reveals Enhancer-dependent Sox2 Transcription in the**  
2 **Absence of Enhancer Proximity**

3  
4 **AUTHOR NAMES AND AFFILIATIONS:** Jeffrey M. Alexander<sup>1</sup>, Juan Guan<sup>2</sup>, Bo Huang<sup>2,3,4</sup>,  
5 Stavros Lomvardas<sup>5,6</sup>, Orion D. Weiner<sup>1,3\*</sup>

6  
7 <sup>1</sup>Cardiovascular Research Institute

8 <sup>2</sup>Department of Pharmaceutical Chemistry

9 <sup>3</sup>Department of Biochemistry and Biophysics, University of California, San Francisco;

10 <sup>4</sup>Chan Zuckerberg Biohub

11 <sup>5</sup>Department of Biochemistry and Molecular Biophysics

12 <sup>6</sup>Mortimer B. Zuckerman Mind Brain and Behavior Institute, Columbia University

13 \*Corresponding Author

14

15

16 **ABSTRACT**

17 Enhancers are important regulatory elements that can control gene activity across vast genetic  
18 distances. However, the underlying nature of this regulation remains obscured because it has  
19 been difficult to observe in living cells. Here, we visualize the spatial organization and  
20 transcriptional output of the key pluripotency regulator Sox2 and its essential enhancer Sox2  
21 Control Region (SCR) in living embryonic stem cells (ESCs). We find that Sox2 and SCR show  
22 no evidence of enhanced spatial proximity and that spatial dynamics of this pair is limited over  
23 tens of minutes. Sox2 transcription occurs in short, intermittent bursts in ESCs and, intriguingly,  
24 we find this activity demonstrates no association with enhancer proximity, suggesting that direct  
25 enhancer-promoter contacts do not drive contemporaneous Sox2 transcription. Our study  
26 establishes a framework for interrogation of enhancer function in living cells and supports an  
27 unexpected mechanism for enhancer control of Sox2 expression that uncouples transcription  
28 from enhancer proximity.

29

30 **INTRODUCTION**

31 Chromosomes are packaged and organized non-randomly within the mammalian  
32 nucleus. Emerging evidence suggests that 3D genome topology plays a fundamental role in  
33 genome control, including the regulation of gene expression programs (Bickmore, 2013; Krijger  
34 and de Laat, 2016; Schwarzer and Spitz, 2014). Within the nucleus, each chromosome  
35 occupies discrete chromosomal territories (Cremer et al., 2006). These territories are further  
36 structured into distinct compartments that separate active and repressive chromatin (Lieberman-  
37 Aiden et al., 2009; Sexton et al., 2012). At finer scales, chromosomes are partitioned into  
38 largely-invariant, sub-megabase sized topologically-associated domains (TADs), which break up  
39 the linear genome into interactive neighborhoods (Dixon et al., 2012; Nora et al., 2012).  
40 Chromosomal contacts are disfavored across TAD boundaries. Thus, most cell-type specific  
41 contacts occur within TAD boundaries, and disruption of TAD architecture leads to dysregulation  
42 of gene expression (Downen et al., 2014; Gröschel et al., 2014; Guo et al., 2015; Lupiáñez et al.,  
43 2015; Narendra et al., 2015; Nora et al., 2017).

44 Within this 3D framework, gene expression programs are established by non-coding  
45 regulatory enhancer elements. First discovered within a metazoan genome over three decades  
46 ago (Banerji et al., 1983), it is now predicted that greater than 300,000 enhancers are encoded  
47 in the human genome (The ENCODE Project Consortium, 2012; Zhu et al., 2013). Enhancers  
48 demonstrate unique epigenetic markings, enriched for H3K4me1 and H3K27ac (Creyghton et  
49 al., 2010; Heintzman et al., 2007; Rada-Iglesias et al., 2010), and are highly accessible, as  
50 demonstrated by elevated DNase sensitivity and transposition susceptibility (Boyle et al., 2008;  
51 Buenrostro et al., 2013; Thurman et al., 2012). These features facilitate transcription factor  
52 occupancy, enrichment of co-activators such as p300 and Mediator, and transcription of non-  
53 coding enhancer RNAs (eRNAs), all of which play important roles in modulation of target gene  
54 expression (Kim et al., 2015; Long et al., 2016). Importantly, enhancer activity is highly specific  
55 across cell types (Heintzman et al., 2009; The ENCODE Project Consortium, 2012; Zhu et al.,

56 2013) and dynamic during cellular differentiation (Blum et al., 2012; Buecker et al., 2014; Huang  
57 et al., 2016; Wamstad et al., 2012), and this activity correlates with nearby gene expression.  
58 Thus, enhancers are fundamental to achieving gene expression programs that orchestrate  
59 embryonic development and drive disease pathogenesis. Understanding the mechanism by  
60 which enhancers influence target genes is crucial to decode gene regulation.

61 The textbook model proposes that enhancers influence target gene promoters through  
62 protein-protein complexes and physical interaction mediated by a DNA loop (Alberts et al.,  
63 2014). Experimental support for this model comes primarily from numerous chromosome  
64 conformation capture (3C)-based studies that have identified enriched contacts between  
65 enhancer and promoter elements (Jin et al., 2013; Li et al., 2012; Rao et al., 2014; Sanyal et al.,  
66 2012; Weintraub et al., 2017) and recent observations that driving contacts between an  
67 enhancer-promoter pair is sufficient to augment gene expression (Bartman et al., 2016; Deng et  
68 al., 2012; 2014; Morgan et al., 2017). However, other observations fit this model poorly. For  
69 example, *sonic hedgehog* (*Shh*) enhancers that drive expression in the brain move further,  
70 rather than closer, to the *Shh* gene when activated (Benabdallah et al., 2017). Furthermore, in  
71 *Drosophila*, coupled reporter genes regulated by a shared enhancer nevertheless show  
72 coordinated transcriptional bursting, suggesting either that an enhancer can contact multiple  
73 genes at once or that contact can be decoupled from transcription (Fukaya et al., 2016; Lim et  
74 al., 2018). Super enhancers -- clusters of enhancers that are highly enriched for coactivators  
75 like Mediator and BRD4 (Lovén et al., 2013; Whyte et al., 2013) -- have been proposed to  
76 activate transcription through nucleation of activator droplets rather than stepwise assembly of  
77 transcription complexes (Hnisz et al., 2017), providing a possible mechanism for enhancer  
78 action at a distance, and recent imaging has provided support for this idea (Cho et al., 2018;  
79 Sabari et al., 2018). Thus, how distal elements communicate with and regulate gene promoters  
80 in living cells remains an open question.

81 Live-cell imaging represents a powerful approach to dissect chromatin architecture and  
82 gene regulation in the context of single cells to address these questions (Chen et al., 2013;  
83 2018; Germier et al., 2017; Gu et al., 2018; Lucas et al., 2014). However, interrogation of both  
84 enhancer-gene spatial organization and real-time transcriptional activity of the regulated gene  
85 has not yet been realized in living mammalian cells. Here, we investigate the dynamic 3D  
86 organization and transcriptional activity of the *Sox2* gene and its distal enhancer *Sox2* Control  
87 Region (SCR) in mouse embryonic stem cells (ESCs) using live-cell microscopy.  
88 We find that the *Sox2* promoter and SCR demonstrate similar spatial characteristics to non-  
89 regulatory regions in ESCs, while differentiation of ESCs leads to significant compaction  
90 throughout the *Sox2* region. Time-lapse microscopy revealed that individual loci explore only a  
91 fraction of their potential spatial range during the ~25 minute imaging window, driving high cell-  
92 to-cell variability in *Sox2* locus conformation and *Sox2*/SCR encounters. Incorporation of an  
93 MS2 transcriptional reporter into the *Sox2* gene demonstrated that transcription occurs in  
94 intermittent bursts in ESCs but, surprisingly, showed no correlation with spatial proximity  
95 between the enhancer-promoter pair. Together, our findings establish the spatial and  
96 transcriptional characteristics of an essential pluripotency gene and suggest an unconventional  
97 mechanism for enhancer control of *Sox2* expression that uncouples transcription from enhancer  
98 proximity.

## 99 100 **RESULTS**

### 101 102 **Engineering the Endogenous *Sox2* Locus to Visualize Locus Organization in Living** 103 **Embryonic Stem Cells**

104 To visualize discrete loci within the mammalian genome, we turned to the well-  
105 established genetic labeling method of incorporating repetitive arrays of exogenous operator  
106 sequences, an approach that has been extensively used to visualize chromosomal loci (Belmont  
107 and Straight, 1998; Lucas et al., 2014; Marshall et al., 1997; Masui et al., 2011; Michaelis et al.,  
108 1997; Robinett et al., 1996; Roukos et al., 2013). To independently visualize two regions of  
109 interest, we utilized the tetO/TetR system to visualize one chromosomal location. For the other  
110 chromosomal location, because of the reported issues using lacO/lacI in ESCs (Lucas et al.,

114 2014; Masui et al., 2011), we developed a new tool based on the cuO/CymR pair. This is a  
115 repressor system from the bacteria *Pseudomonas putida* that is involved in cumate metabolism  
116 and has been previously used as a tool for inducible gene expression (Mullick et al., 2006). We  
117 opted to target these arrays to the mouse genome using a two-step genetic engineering  
118 strategy with bacteriophage integrases for two reasons (**Figure 1A**). First, repetitive sequences  
119 can be unstable during vector construction, making it advantageous to use generic targeting  
120 vectors portable between genomic loci. Second, we worried the repetitive arrays might  
121 recombine during genomic targeting using homologous recombination. To target the tetO/TetR  
122 and cuO/CymR labels to specific loci within the mouse genome, we first placed attP landing  
123 sites for the PhiC31 (Raymond and Soriano, 2007; Thyagarajan et al., 2001) and Bxb1 (Xu et al.,  
124 2013) integrase systems using CRISPR/Cas9 homology directed repair. We then integrated  
125 generic PhiC31 or Bxb1 targeting vectors bearing either the tetO or cuO array, respectively, at  
126 the corresponding landing sites through transient expression of the PhiC31 and Bxb1  
127 integrases. This strategy was both modular in design and portable between genomic loci. To  
128 target two regions on the same chromosome, we used 129/Cast F1 hybrid ESCs, derived from  
129 crossing the 129 mouse strain to the divergent subspecies *Mus musculus castaneus*. This  
130 allowed us to limit editing to the 129 allele by using genetic polymorphisms between the two  
131 parental genomes to design allele-specific CRISPR guide RNAs.

132 We chose the murine *Sox2* locus as our genetic model. *Sox2* encodes a high-mobility  
133 group (HMG) DNA-binding transcription factor with important roles in embryonic development  
134 (Kamachi and Kondoh, 2013; Lefebvre et al., 2007; Sarkar and Hochedlinger, 2013), embryonic  
135 and adult neural progenitors (Pevny and Nicolis, 2010), and the progression of many forms of  
136 cancer (Weina and Utikal, 2014; Wuebben and Rizzino, 2017). *Sox2* also functions as an  
137 essential regulator of pluripotency, where it cooperates with other transcriptional regulators to  
138 maintain the pluripotency transcriptional program and keep embryonic stem cells in the  
139 undifferentiated state (Chen et al., 2008a; Young, 2011). *Sox2* resides in an isolated  
140 neighborhood on chromosome 3, as the sole protein-coding gene in a ~1.6 Mb region.  
141 Numerous regulatory elements that modulate *Sox2* expression have been identified in this  
142 neighborhood across amniotes (Okamoto et al., 2014; Tomioka et al., 2002; Uchikawa et al.,  
143 2003; Zappone et al., 2000). However, *Sox2* expression in mouse ESCs is controlled by a  
144 single, strong distal enhancer called the *Sox2* Control Region (Li et al., 2014; Zhou et al., 2014),  
145 which is robustly enriched with H3K27ac, DNase hypersensitivity, RNA Polymerase II (RNAP),  
146 and transcription factor occupancy (herein referred to as SCR, **Figure 1B**). Genetic ablation of  
147 SCR in ESCs leads to loss of *Sox2* expression in *cis*. Moreover, SCR maintains *Sox2*  
148 expression levels in the context of compound deletion of alternative *Sox2* enhancers,  
149 suggesting SCR is sufficient for *Sox2* regulation in ESCs (Zhou et al., 2014). Publicly available  
150 circularized chromosome conformation capture (4C) and HiC datasets reveal enriched contacts  
151 between SCR and the *Sox2* promoter region, suggesting that these enhancer-promoter  
152 interactions may play an important role in SCR function (**Figure 1B**).

153 We generated three distinct modified cell lines in 129/Cast F1 hybrid ESCs (**Figure 1B**,  
154 bottom) First, we labeled the *Sox2* promoter region and SCR by integrating the cuO array 8 kb  
155 centromeric to the *Sox2* TSS (*Sox2*-8C) and the tetO array approximately 5 kb telomeric to the  
156 SCR boundary (i.e. 117 kb telomeric to *Sox2* TSS, *Sox2*-117T). We refer to this pair as *Sox2*-  
157 SCR. Secondly, we created two control ESC lines: one with two arbitrary loci labeled with cuO  
158 and tetO (*Sox2*-43T<sup>tetO/+</sup>; *Sox2*-164T<sup>cuO/+</sup> or Control-Control) and a second where we labeled  
159 SCR along with a non-specific telomeric locus (*Sox2*-117T<sup>tetO/+</sup>; *Sox2*-242T<sup>cuO/+</sup> or SCR-Control).  
160 In both cases, the genetic distance between labels was similar to that of *Sox2*-SCR. Both  
161 control pairs show low contact propensity in chromosome conformation capture data (**Figure**  
162 **1B**). We verified the correct placement of the cuO and tetO labels for each locus using PCR  
163 with primers that span the unique recombination arms generated after plasmid integration  
(**Figure 1—figure supplement 1, Supplementary file 1,2**). We detected a similar *Sox2*  
expression ratio (129 / CastEiJ) using an allele-specific qPCR assay for modified cell lines  
compared to the parental ESCs, suggesting *Sox2* regulation is intact despite genetic alteration

164 of the locus (Analysis of Variance,  $p = 0.215$ , **Figure 1—figure supplement 2**).

165

## 166 Visualization of the Sox2 Region in ESCs Reveals Minimal Evidence for Sox2/SCR 167 Interactions

168 We were first interested in measuring the 3D distance between Sox2 and the SCR  
169 enhancer in living ESCs. To this end, we stably coexpressed CymR-GFP and TetR-tdTomato  
170 (TetR-tdTom) fusion proteins in Sox2-SCR ESCs using ePiggyBac transposon-based gene  
171 delivery (Lacoste et al., 2009). This allowed for visualization of both the Sox2 promoter (cuO)  
172 and SCR (tetO) within the nucleus using live-cell fluorescence confocal microscopy. We  
173 confirmed that coexpression of CymR-GFP and TetR-tdTom did not significantly alter Sox2  
174 expression from the modified 129 allele by qPCR (**Figure 1—figure supplement 2**). 3D time  
175 series of proliferating ESCs showed the majority of cells demonstrated a single, bright focus of

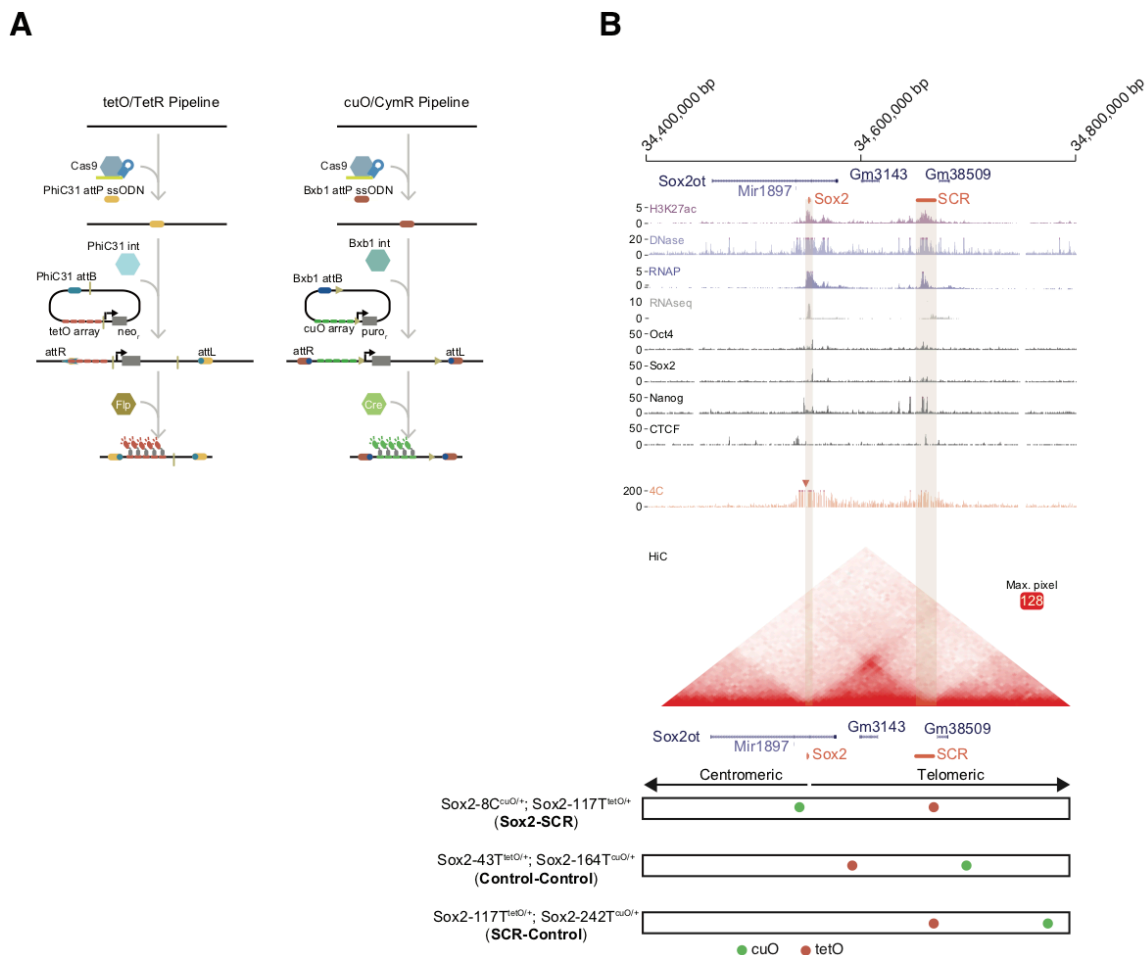

**Figure 1. The Sox2 Locus As a Model for Visualization of Enhancer-Promoter Regulation in Mouse Embryonic Stem Cells.** A) To visualize chromosome loci in living cells, we have used tetO/TetR and cuO/CymR genetic labels. Our pipeline for insertion of these labels into the mouse genome is shown. First, CRISPR-Cas9 is used to place an attP intergrase landing site. Second, a targeting plasmid bearing the compatible attB sequence, the tetO or cuO array, and a selection cassette is introduced along the integrase (Int) to mediate site-specific integration. The selection cassette can then be subsequently removed by Cre/Flp recombinase. B) The Sox2 locus in mouse ESCs. Genomic browser tracks of epigenomic and expression data demonstrate high levels of histone acetylation, RNA polymerase II, and transcription factor (OCT4, SOX2, NANOG, CTCF) occupancy at Sox2 and the distal Sox2 Control Region enhancer (tan boxes). Data from 4C and HiC experiments demonstrate chromosomal contacts at the Sox2 locus. For 4C data, read density indicates contact frequency with a fixed position near the Sox2 promoter (red triangle). Y-axis for browser tracks is reads per million. For HiC, all pairwise contact frequencies are mapped using a heatmap. The intensity of each pixel represents the normalized number of contacts detected between a pair of loci. The maximum intensity is indicated in red square. At bottom, locations of the cuO- and tetO-arrays for the three cell lines utilized for this study. Sox2-8C<sup>cuO/+</sup>; Sox2-117T<sup>tetO/+</sup> (Sox2-SCR) ESCs were used to track Sox2/SCR location. Two control lines, Sox2-43T<sup>tetO/+</sup>; Sox2-164T<sup>cuO/+</sup> (Control-Control) and Sox2-117T<sup>tetO/+</sup>; Sox2-242T<sup>cuO/+</sup> (SCR-Control) were analyzed for comparison. H3K27ac, RNA polymerase II (RNAP), and RNAseq data from GSE47949 (Wamstad et al., 2012); DNase data from GSE51336 (Vierstra et al., 2014); SOX2, OCT4, NANOG, and CTCF data from GSE11431 (Chen et al., 2008b); 4C data from GSE72539 (de Wit et al., 2015); and HiChIP data from GSE96107 (Bonev et al., 2017).

176 CymR-GFP and TetR-tdTom in the ESC nucleus in close proximity. Many of these foci revealed  
177 the presence of two juxtaposed sister chromatids (**Video 1**). Because the overlapping signal  
178 from adjacent, identical arrays would degrade the resolution of our localization, we excluded  
179 these loci from our analysis and focused on cells demonstrating single, diffraction-limited spots  
180 for cuO and tetO, likely representing cells in the G1/early S phase of the cell cycle.

181 3C data demonstrate enriched contacts between Sox2 and SCR (Beagan et al., 2017;  
182 Bonev et al., 2017; de Wit et al., 2015; Kieffer-Kwon et al., 2013; Mumbach et al., 2016; Phillips-  
183 Cremins et al., 2013; Zhou et al., 2014), supporting the possibility of a looped locus  
184 configuration with Sox2 and SCR juxtaposed in 3D space. A mixture of looped and unlooped  
185 configurations across the population might be expected to produce a multimodal distance  
186 distribution with short and large distance peaks representing looped and unlooped states,  
187 respectively, as was recently observed for an enhancer system in *Drosophila* (Chen et al.,  
188 2018). To investigate the distribution of Sox2/SCR distances, we determined the 3D position of  
189 cuO and tetO for each locus, assembled 3D tracks, and calculated 3D separation distances  
190 between the labels across time (**Figure 2A, Supplementary file 3**). By localization of  
191 fluorescent beads at a comparable signal-to-noise ratio, we estimate our localization precision in  
192 the X, Y, and Z dimensions to be  $14.7 \pm 4.4$  nm,  $11.8 \pm 3.4$  nm, and  $38.4 \pm 12$  nm, respectively,  
193 for cuO/CymR and  $20.4 \pm 7.6$  nm,  $19 \pm 7.8$  nm,  $59.5 \pm 21$  nm for tetO/TetR (**Figure 2—figure**  
194 **supplement 1**). 84% and 62% of our assembled tracks span the full time series (> 75 frames)  
195 for cuO and tetO, respectively (**Figure 2—figure supplement 2**). Visualization of these data as  
196 a histogram revealed a unimodal distribution with positive skew (Hartigan's Dip Test for  
197 multimodality,  $p = 1$ ). On average, Sox2/SCR labels are separated by a few hundred  
198 nanometers in the ESC nucleus (mean = 339 nm, **Figure 2B**). Infrequently, we observed the  
199 Sox2 region to adopt an extended conformation, leading to considerable Sox2/SCR separation  
200 distance (2.1% of measurements > 750 nm, 0.35% of measurements > 1  $\mu$ m).

201 One possible interpretation of a unimodal distance distribution is that the Sox2/SCR pair  
202 exists predominantly in an interacting state. To investigate this possibility, we repeated our  
203 analysis with our two control locus pairs. We found that, while one control pair (Control-Control)  
204 did show increased separation distance as compared to Sox2/SCR, our other control set (SCR-  
205 Control), consisting of the SCR paired with a non-specific partner, showed a similar distribution  
206 to Sox2/SCR (**Figure 2C**). Indeed, no significant differences between Sox2-SCR and SCR –  
207 Control were found when comparing the mean distance per cell, while Control-Control  
208 demonstrated significantly increased distances (**Figure 2D**). Reinspection of chromosomal  
209 contact maps revealed evidence for a topological boundary, potentially established by the SCR  
210 element, separating the two labeled regions in the Control-Control configuration (**Figure 1A**),  
211 which could account for the elevated 3D distances measured for Control-Control, as has been  
212 observed for TAD boundaries (Dixon et al., 2012; Nora et al., 2012). These results demonstrate  
213 that SCR does not show greater proximity to the Sox2 gene than to a non-specific control.

214 To further exclude the possibility that our measurements reflected a constitutive  
215 interaction state, we sought to estimate the distance profile for a static Sox2/SCR interaction. To  
216 this end, we used CRISPR/Cas9 to delete a ~111 kb fragment between the cuO and tetO labels  
217 in the Sox2-SCR configuration, leaving a 14 kb tether between the labels (**Figure 1—figure**  
218 **supplement 1**). This is similar in length to the effective tether (~17 kb) between labels expected  
219 during a direct interaction between the Sox2 TSS and the center of the SCR. Visualization of

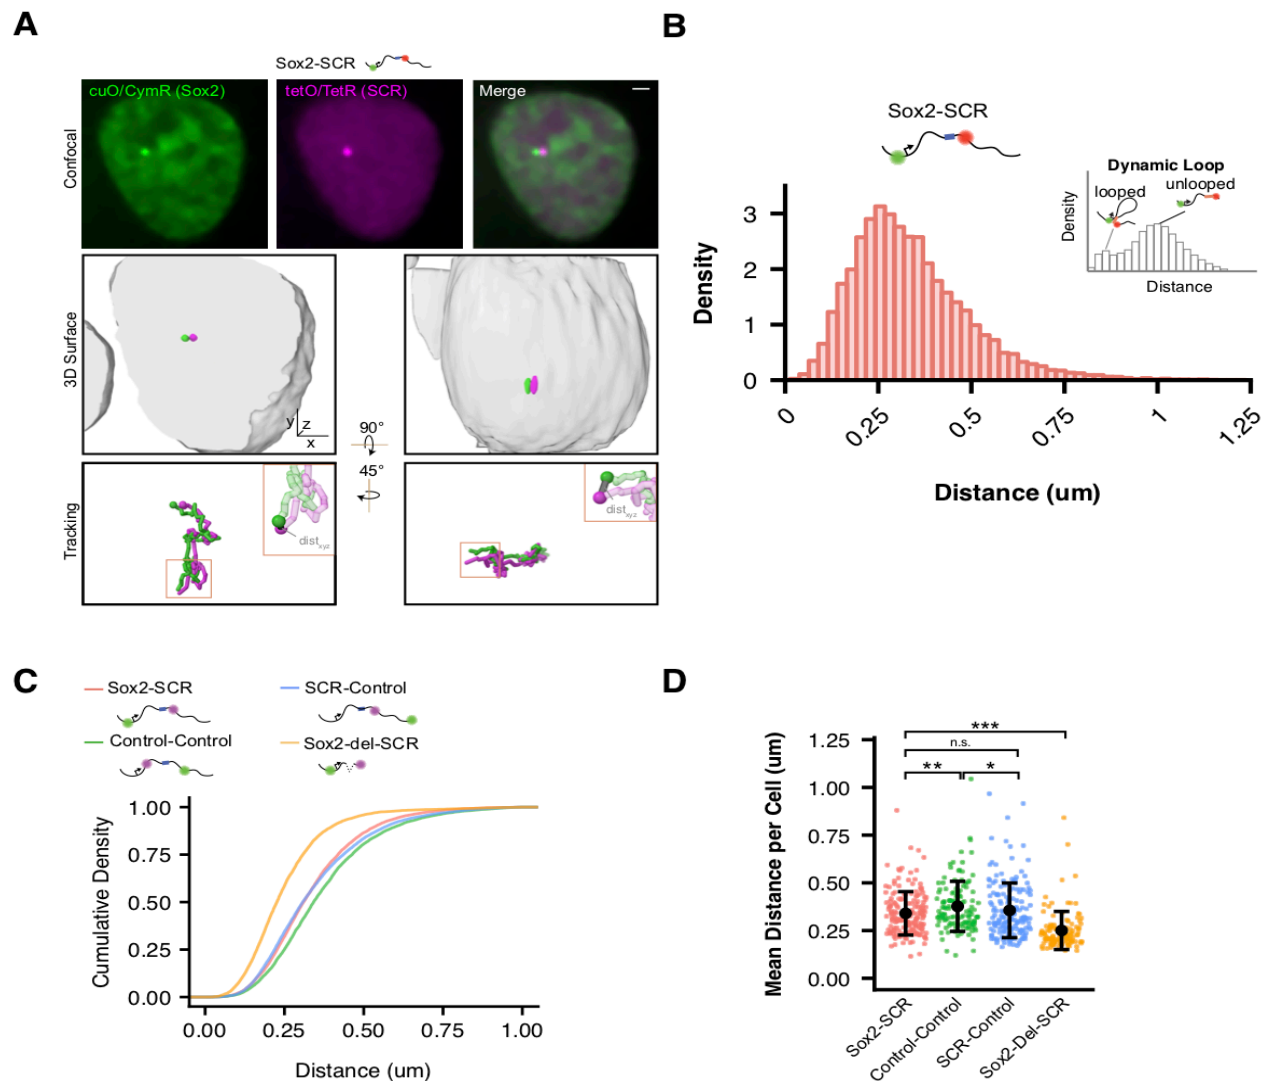

**Figure 2. Visualization of the Sox2 Region in ESCs Reveals Minimal Evidence for Sox2/SCR Interactions**

A) Top, confocal Z slices of CymR-GFP and TetR-tdTom in Sox2-SCR ESCs, labeling the Sox2 promoter and SCR region with bright puncta, respectively. Middle, 3D surface rendering of the ESC nucleus shown above. A single fluorescence channel was rendered white and transparent to outline the nucleus, and GFP and tdTom surfaces were rendered with high threshold to highlight the cuO and tetO arrays, respectively. Bottom, tracking data is rendered for the nucleus shown above. Inset shows example of calculated 3D separation distance between the two labels. Scale bar is 1 um. B) Normalized histogram of 3D separation distance for Sox2-SCR ESCs demonstrates a single peak (Hartigan's Dip Test for multimodality,  $p = 1$ ). Schematic for an hypothetical looping enhancer-promoter pair is shown as an inset, with two peaks. C) Cumulative density of 3D separation distance for Sox2-SCR versus control comparisons. D) Mean 3D separation distance per cell for each label pair. Population means and standard deviations are shown for each sample. Mann-Whitney, \*  $p < 0.05$ , \*\*  $p < 0.01$ , \*\*\*  $p < 0.001$

220 this label configuration in living ESCs demonstrated a significant shift to more proximal distance  
 221 values (**Figure 2C,D**). These results are consistent with our expectation that a direct Sox2/SCR  
 222 interaction would be confined shorter 3D distances than those observed for the Sox2-SCR pair  
 223 and validate our experimental capacity to measure these differences. Taken together, these  
 224 data demonstrate no unique characteristics for Sox2 and SCR distances in ESCs. While these  
 225 observations could suggest very infrequent interaction events, they also may allude to  
 226 fundamental differences between spatial proximity and the features captured by proximity  
 227 ligation using 3C approaches (see DISCUSSION).  
 228

### 229 Differentiation of ESCs to Diverse Lineages Correlates with Sox2 Locus Compaction

230 We next differentiated our modified cell lines in order to determine how Sox2 locus

231 organization is altered upon cellular differentiation (**Figure 3A**). To this end, we derived neural  
 232 precursor cells (NPCs), a cell-type that maintains *Sox2* expression despite inactivation of the  
 233 SCR and reduced of *Sox2*/SCR contacts by chromosome conformation capture carbon copy  
 234 (5C) (**Figure 3B**)(Beagan et al., 2017). We validated that our NPC lines expressed NPC marker  
 235 genes and demonstrated their ability to differentiate into both neurons and astrocytes (**Figure**  
 236 **3—figure supplement 1**). As an additional comparison, we differentiated our ESC lines into  
 237 FLK1<sup>+</sup>/PDGFR $\alpha$ <sup>+</sup> mesodermal precursors (MES), a cell type which downregulates *Sox2*  
 238 expression and inactivates the SCR element (**Figure 3B**). Interestingly, we observed that all  
 239 label pairs embedded in the *Sox2* locus showed greater proximity in differentiated cells  
 240 compared to ESCs (**Figure 3C**). These changes were significant when comparing mean  
 241 distances per cell between label pairs in NPCs or MES with ESCs (**Figure 3D**). These data  
 242 suggest the entire *Sox2* locus adopts a more compact conformation upon ESC differentiation,  
 243 regardless of transcriptional status of *Sox2*.

244 To explore if compaction of the *Sox2* locus conformation might be driven by inactivation  
 245 of the SCR element (which occurs in both NPCs and MES) or could be driven by other factors  
 246 related to cellular differentiation, we generated a heterozygous genetic deletion of the SCR  
 247 element on the 129 allele in ESCs using CRISPR/Cas9 (**Figure 1—figure supplement 1**,  
 248 **Figure 3—figure supplement 2**). These cells show no signs of differentiation and maintained  
 249 naive ESC morphology, consistent with previous studies (Zhou et al., 2014). Moreover, SCR  
 250 deletion led to reduction of *Sox2* expression from the *cis* allele to undetectable levels by qPCR  
 251 (**Figure 1—figure supplement 2**). Live-cell visualization of the cuO and tetO labels in these  
 252 cells demonstrated a slight shift in 3D distances towards greater proximity; however, this shift  
 253 was small compared to that seen after differentiation to NPCs or MES (**Figure 3—figure**

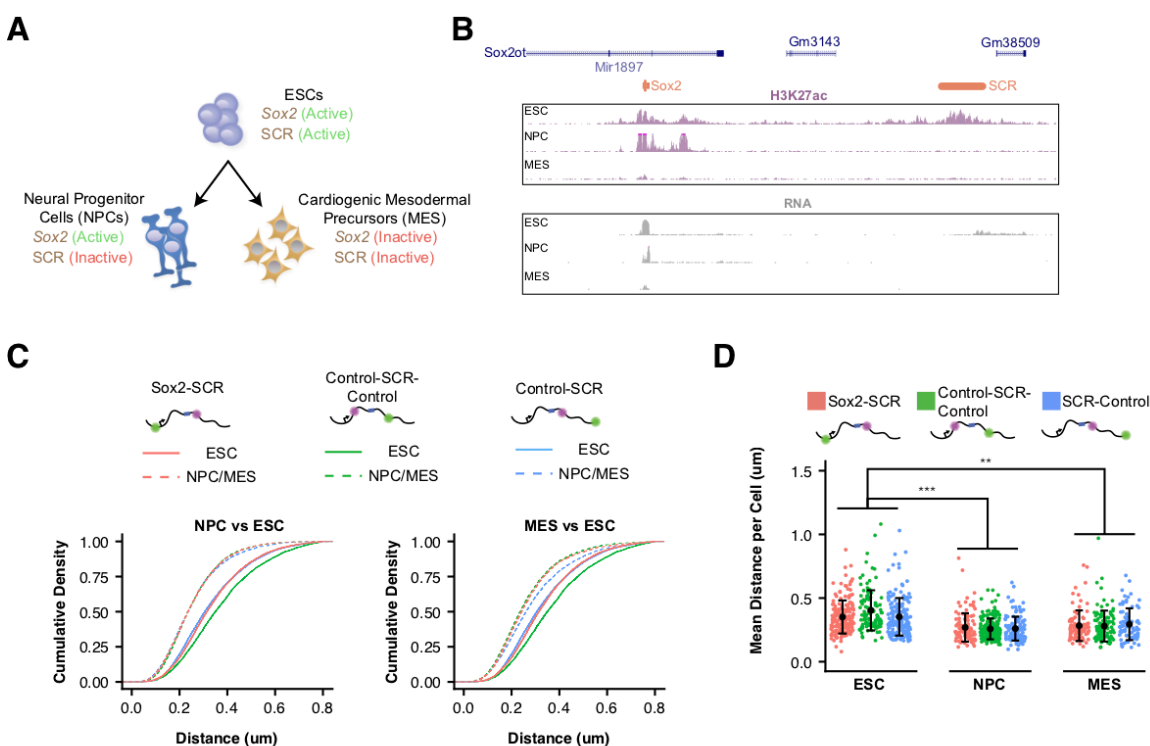

**Figure 3. *Sox2* Locus Compacts upon ESC Differentiation.** A) ESCs were differentiated into neural progenitor cells (NPCs), which maintain expression of *Sox2* but inactivate the SCR, and cardiogenic mesodermal precursors (MES), which inactivate both *Sox2* and the SCR. B) Browser tracks of H3K27ac and RNA-seq data from ESCs, NPCs, and MES demonstrate the activation status of *Sox2* and SCR in each cell type. Y-axis is 0-5 reads per million for H3K27ac data and 0-10 reads per million for RNA-seq data. C) Cumulative density of 3D separation distance for *Sox2*-SCR and two control pairs for NPCs (left) and MES (right). ESC data is shown for comparison as solid lines on each graph and reproduced from Figure 2C. D) Mean 3D separation distance per cell for each label pair, organized by cell type. Statistical analysis is for each matched pair-wise comparison between cell types. All p-values are below reported value. Mann-Whitney (\*\* p < 0.01, \*\*\* p < 0.001). H3K27ac data from GSE47949 (Wamstad et al., 2012) and GSE24164 (Creighton et al., 2010). RNAseq data from GSE47949 and GSE44067 (Zhang et al., 2013).

254 **supplement 2**). Hierarchical clustering analysis of the similarity between distance histograms  
255 revealed that SCR-deleted ESCs were most similar to other ESC lines (**Figure 3—figure**  
256 **supplement 2**). These observations suggest that Sox2 locus organization is significantly altered  
257 with ESC differentiation but largely robust to changes in Sox2 or SCR activity.

### 258 259 **Slow Sox2 Locus Conformation Dynamics Lead to Limited Exploration and Variable** 260 **Enhancer Encounters**

261 We next investigated the dynamics of Sox2 spatial organization and focused our  
262 analysis of the ESC state. While all three label pairs showed comparable distance profiles  
263 across the cell population, we observed striking variation in locus organization between  
264 individual cells (**Figure 4A,B, Video 2**). We observed label pairs in prolonged compact or  
265 extended conformations as well as gradual or sharp transitions between the two (**Figure 4A**).  
266 However, few label pairs explored their entire range – the distance spread observed across our  
267 cell population -- during our imaging window (~25 minutes), demonstrating that Sox2 locus  
268 conformation dynamics are slow over tens of minutes.

269 To better understand this phenomenon, we investigated the dynamic properties of our  
270 Sox2-SCR label pair, as well as both control pairs. Both relative step sizes (defined as the 3D  
271 displacement of the cuO label between frames if the tetO location is fixed) and the change in 3D  
272 separation distance between frames were significant (e.g. 180 nm and 79 nm, respectively, for  
273 the Sox2-SCR pair, 20 sec per frame, **Figure 4—figure supplement 1**). However, the relative  
274 displacement between two adjacent frames was rarely additive. Instead, we found a strong bias  
275 in the XY plane angle between two successive relative displacements toward 180°,  
276 demonstrating anti-correlation in the directionality of two adjacent steps in time (**Figure 4—**  
277 **figure supplement 1**, Kuiper's Test  $p < 0.01$ ). These data point to extensive oversampling of  
278 the local environment by individual loci within the Sox2 region. These findings are consistent  
279 with the polymer nature of chromatin (Dekker and Mirny, 2016) and the viscoelastic nature of  
280 the nucleoplasm (Lucas et al., 2014).

281 To further capture the dynamics of Sox2 organization, we computed the autocorrelation  
282 function. The autocorrelation function describes the correlation between measurements  
283 separated by various lag times and can be utilized to quantify memory or inertia in single cell  
284 quantities (e.g. protein levels) compared to the population average (Sigal et al., 2006)(**Figure**  
285 **4C**). Autocorrelation values near one are expected between closely spaced measurements,  
286 decaying towards zero for larger lag times. An autocorrelation coefficient of zero indicates that  
287 the underlying process has randomized during the time lag between the relevant  
288 measurements. Computation of the autocorrelation function for each label pair revealed a  
289 monotonic autocorrelation decay with increasing lag times (**Figure 4D**). We observe an initial  
290 rapid reduction in autocorrelation in the small time lag regime, driven by a period of effective  
291 local exploration. As our probes begin to oversample the local environment (1-2 mins), the  
292 autocorrelation decay slows, reflecting the constraint on locus diffusion within the nuclear  
293 environment. Interestingly, at long time lags (> 10 mins), the autocorrelation function for both  
294 control pairs appears to flatten to a slope of zero, suggesting that conformational memory for  
295 some loci may be quite long-lived.

296 An important implication of this behavior of chromatin is that first encounter times  
297 between loci is highly dependent on the initial configuration of the genomic region (**Figure 4E**,  
298 Fisher's Exact Test,  $p = 1.42 \times 10^{-3}$ ). Indeed, while 73% of Sox2-SCR pairs that start within 200  
299 nm of each other are observed to have at least one encounter (defined as closer than 100 nm)  
300 over the 25 minute imaging window, this drops to 18% for pairs that start greater than 600 nm  
301 away. These data suggest that enhancer proximity, and therefore the capacity for direct  
302 enhancer-promoter contact, is likely to be highly variable across time within a cell and between  
303 cells within a population.

### 304 305 **Visualization of Sox2 Transcriptional Bursts in Living ESCs**

306 We next explored the temporal relation between 3D organization of the Sox2 locus and  
307 transcription. To this end, we utilized the well-established MS2 reporter system to directly  
308 visualize nascent transcription in single living ESCs (Bertrand et al., 1998). Using CRISPR/Cas9



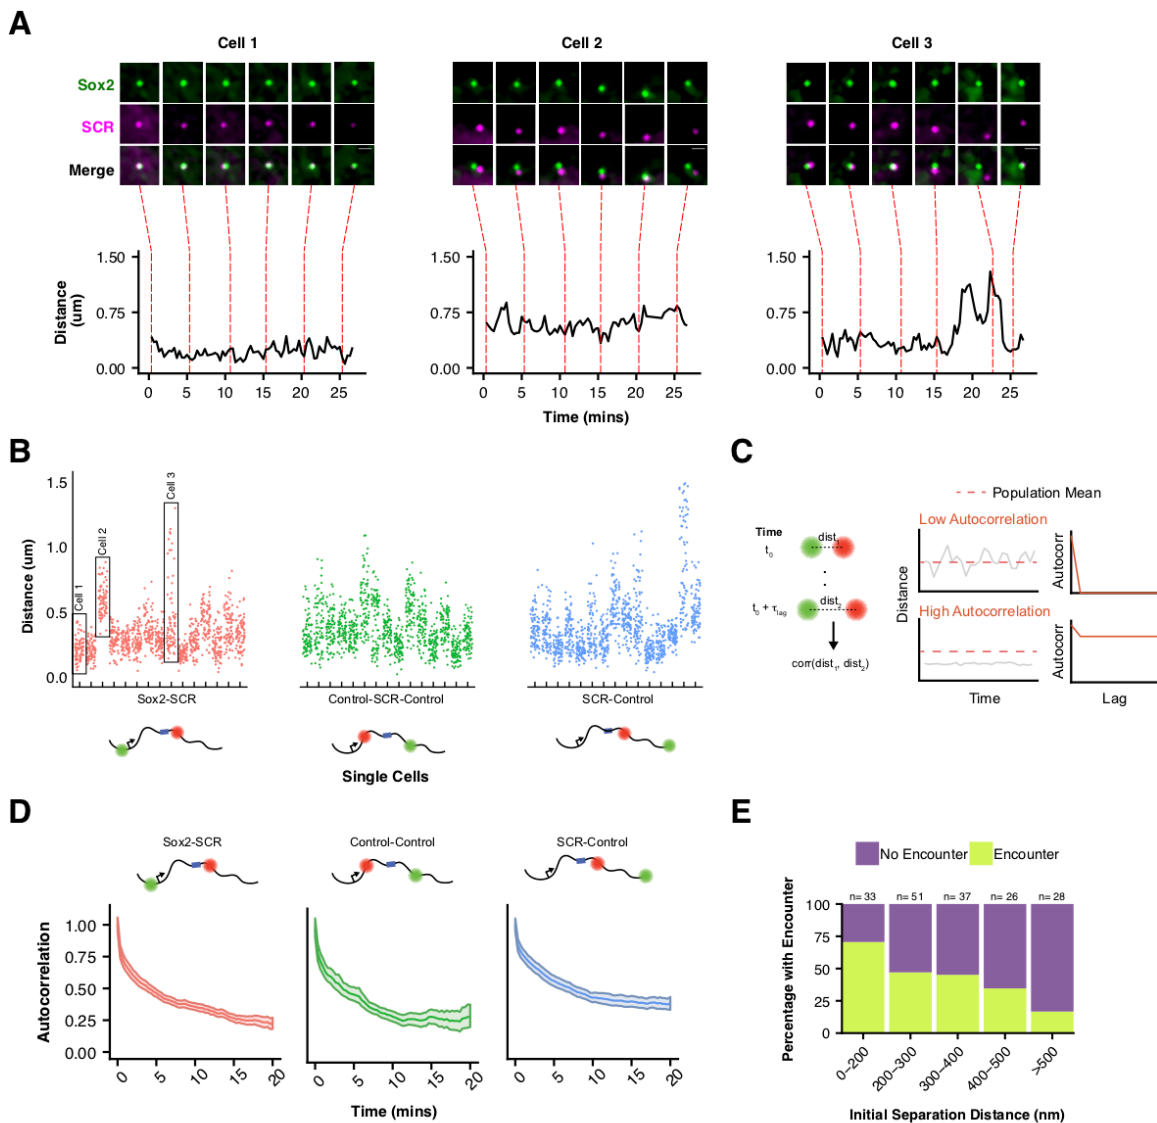

**Figure 4. Slow Sox2 Locus Conformation Dynamics Lead to Limited Exploration and Variable Enhancer Encounters**

A) Maximum-intensity projection images (top) centered on the *Sox2* locus and associated 3D distance measurements (bottom) highlight distinct conformations and dynamics of the *Sox2* locus across cells. Scale bar is 1 µm. B) 3D separation distance measurements for individual cells for Sox2-SCR, Control-SCR-Control, and SCR-Control highlight the heterogeneity of *Sox2* locus organization across the cell population. The three cells depicted in A are boxed. C) Cartoon description of autocorrelation analysis. Distance measurement between two time points are correlated using population statistics, revealing the time scale over which local measurements diverge from the population mean. A cell with low autocorrelation will randomly fluctuate around the population mean, leading the autocorrelation function to quickly decay to zero. A cell with high autocorrelation will deviate substantially from the expected value, only slowly relaxing back to the population mean. In this case, the autocorrelation function will stay significantly above zero for large lag times. D) Autocorrelation function for Sox2-SCR, Control-Control, and SCR-Control pairs demonstrates significant autocorrelation at large lag times, indicating significant memory in 3D conformation across a 20 minute window. The plotted values are mean  $\pm$  95% CI. E) Percent of cells with an encounter between *Sox2* and SCR (defined as within 100 nm) shown as a function of the initial separation distance measured for the cell. Likelihood of an encounter is sharply dependent on the initial conformation of the locus.

309 genome engineering, we replaced the endogenous 129 *Sox2* allele with a modified version that  
 310 includes a P2A-puromycin resistance gene fusion and 24 MS2 stem loops inserted into the 3'  
 311 UTR of the *Sox2* gene (Figure 5—figure supplement 1). We generated this MS2 reporter  
 312 allele in our *Sox2*-SCR labeled cell line to generate *Sox2*-8C<sup>cuO/+</sup>, *Sox2*-117T<sup>tetO/+</sup>, *Sox2*<sup>MS2/WT</sup>  
 313 ESCs (or simply *Sox2*-MS2 ESCs). Transcription levels derived from the *Sox2*-MS2 reporter  
 314 allele were lower than those from the untargeted CastEiJ allele (Figure 1—figure supplement

315 **2**), potentially due to reduced stability of transcripts labeled with MS2 stem loops (Ochiai et al.,  
316 2014). Western blotting of Sox2-MS2 lysate revealed a SOX2 doublet as expected, suggesting  
317 proper expression of both wild-type SOX2 and the SOX-P2A fusion (**Figure 5—figure**  
318 **supplement 1**).

319 We first characterized the transcriptional activity of Sox2-MS2 reporter allele. We co-  
320 expressed a tandem-dimer of the MS2 coat protein fused with 2 copies of tagRFP-T (tdMS2cp-  
321 tagRFP-Tx2), TetR fused with 2 copies of GFP (TetR-GFPx2), and CymR fused with 2 copies of  
322 Halo tag (CymR-HaloX2) in Sox2-MS2 ESCs. These ESCs enabled simultaneous visualization  
323 of the Sox2 promoter, SCR, and nascent Sox2 transcription in living ESCs when imaged in the  
324 presence of the Halo-tag ligand JF646 (Grimm et al., 2015) (**Figure 5A**). Time-lapse confocal  
325 microscopy revealed bright flashes of MS2cp signal in the ESC nucleus, which occurred in  
326 spatial proximity to the cuO and tetO labels, and were similar to the MS2 transcriptional bursts  
327 observed elsewhere (Bothma et al., 2014; Chubb et al., 2006; Lionnet et al., 2011; Martin et al.,  
328 2013; Ochiai et al., 2014). These results suggested the Sox2 MS2 reporter allele enables  
329 visualization of Sox2 transcription.

330 We developed a computational pipeline for identification and quantitation of Sox2  
331 transcriptional activity using the MS2 reporter (see MATERIALS AND METHODS). Briefly, we  
332 identified an ROI surrounding the Sox2 promoter (cuO signal) for each nucleus in each frame,  
333 performed a 2D-gaussian fit on the maximum Z projection of the MS2cp fluorescence signal,  
334 and classified a successful Gaussian fit as transcriptional signal using a k-nearest neighbor  
335 classification scheme. After training, our pipeline classifications matched a manually scored  
336 testing set with 98% accuracy, correctly identifying 70% of curated MS2 signal while maintaining  
337 a false positive rate of 0.1%. Thus, we consider our identified bursts to be a conservative  
338 estimate of Sox2 transcriptional activity.

339 Using our pipeline, we identified a total of 603 individual bursts across 1,208 cells  
340 (**Figure 5B, Supplementary Files 4,5, Video 3**). We found Sox2 transcriptional activity to be  
341 sporadic both between cells and within individual cells across time (**Figure 5C**). Nearly two-  
342 thirds (66.1%) of nuclei lacked detectable Sox2 transcription during our 30 minute imaging  
343 window, with the majority of remaining cells demonstrating transcriptional activity in less than  
344 20% of frames (29.3%, **Figure 5—figure supplement 1**). However, we did observe rare cells  
345 that demonstrated robust transcriptional activity in greater than half the measured frames  
346 (0.25% of cells, **Video 4**). We also found substantial variability in the intensity of transcriptional  
347 bursts and their duration (**Figure 5D**). As a population, we found Sox2-MS2 ESCs spent 4% of  
348 their time with a detectable MS2 burst (**Figure 5E**). Thus, our live-cell measurements of Sox2  
349 transcription suggest short, intermittent transcriptional activity in ESCs.

350 To ensure that our MS2 analysis identified bona fide transcriptional activity, we repeated  
351 our analysis in a number of control contexts. First, we measured bursting frequency in ESCs  
352 that expressed the MS2 coat protein but lacked the Sox2-MS2 reporter allele (Sox2-8C<sup>cuO/+</sup>,  
353 Sox2-117T<sup>tetO/+</sup>, Sox2<sup>WT/WT</sup>). Second, we measured bursting frequency in Sox2-MS2 ESCs that  
354 harbored an SCR deletion in cis (Sox2-8C<sup>cuO/+</sup>, Sox2-117T<sup>tetO/+</sup>, Sox2<sup>MS/WT</sup>, SCR<sup>del/+</sup>). Third, we  
355 measured bursting frequency in Sox2-MS2 ESCs that were treated with the transcriptional  
356 inhibitor 5,6-Dichloro-1-β-D-ribofuranosylbenzimidazole (DRB). In each case, we observed a  
357 significant drop in Sox2 burst frequency (**Figure 5E**). Taken together, these data demonstrate  
358 our ability to accurately identify Sox2 transcriptional events using our MS2 reporter cell line.  
359

### 360 **Sox2 Transcription Is Not Associated with SCR Proximity**

361 Assuming SCR regulates Sox2 transcription via the conventional enhancer looping  
362 model, we would expect Sox2 transcriptional activity to occur during interactions or periods of  
363 Sox2/SCR proximity (**Figure 6A**), given that Sox2 depends of SCR for its ESC expression. To  
364 investigate this prediction, we restricted our analysis to nuclei with single, diffraction-limited  
365 spots for the cuO and tetO labels in our Sox2-MS2 ESC dataset. We calculated 3D distances  
366 between Sox2 and SCR and compared single cell distance traces with matched MS2 signal  
367 traces. We identified some transcriptionally active cells that showed prolonged proximity of the  
368 Sox2/SCR labels. However, we also observed cells which showed robust transcriptional  
369 bursting despite a prolonged extended conformation of the Sox2 region, driving Sox2/SCR

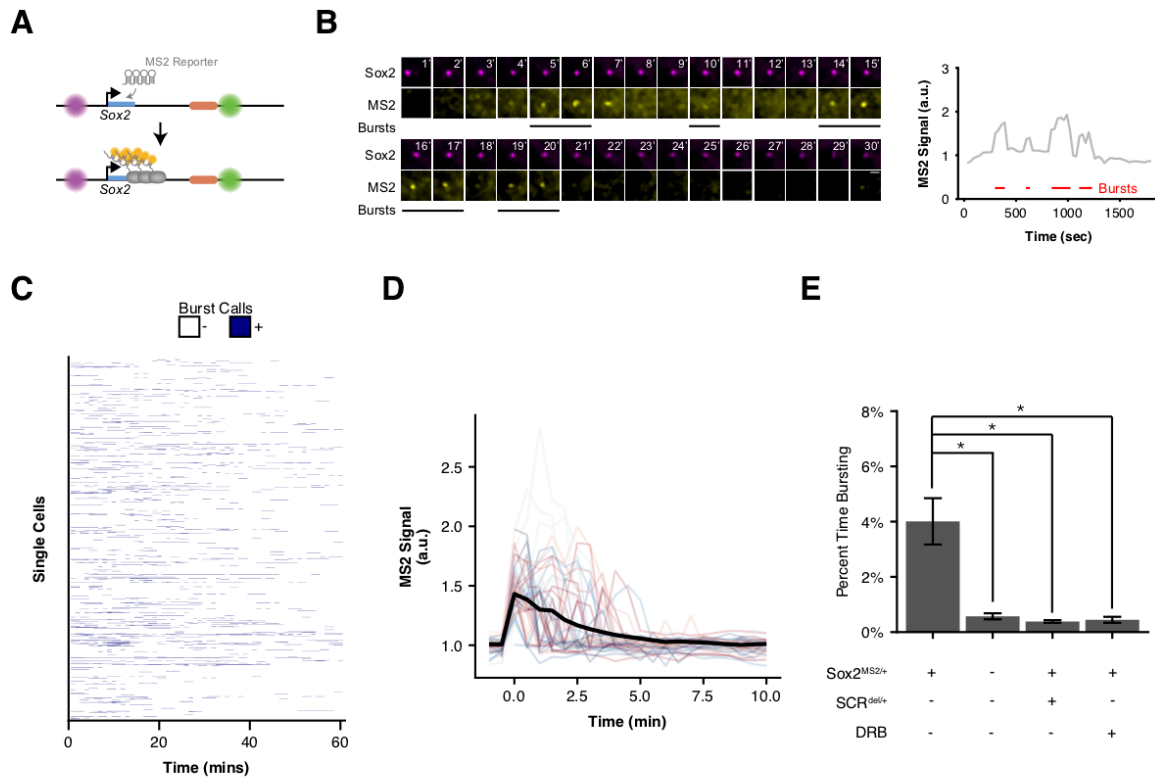

**Figure 5. Visualizing Sox2 Expression in Single Living ESCs Reveals Intermittent Bursts of Transcription.** A) Sox2 locus with cuO-labeled Sox2 promoter and tetO-labeled SCR was further modified to introduce an MS2 transcriptional reporter cassette into the Sox2 gene. Transcription of Sox2 leads to visible spot at the Sox2 gene due to binding and clustering of MS2 coat protein to the MS2 hairpin sequence. B) Maximum-intensity projection images centered on the Sox2 promoter (cuO) show intermittent bursts of MS2 signal, which are quantified on the right. Scale bar is 1  $\mu$ m. C) Single cell trajectories of Sox2 transcriptional bursts as representatively shown in B. D) Aligned Sox2 transcriptional bursts. Randomly selected Sox2 bursts are shown as color traces ( $n = 50$ ). Black line is mean MS2 signal for all annotated bursts. E) Percent time Sox2 transcriptional bursting for various experimental conditions. Bars are mean  $\pm$  standard error of  $\geq 3$  independent experiments. Sox2<sup>MS2/+</sup> indicates cell line harbors the Sox2-MS2 reporter allele. SCR<sup>del/+</sup> indicates presence of an SCR deletion *in cis* with the Sox2-MS2 reporter. DRB indicates treatment with the transcriptional inhibitor 5,6-Dichloro-1- $\beta$ -D-ribofuranosylbenzimidazole (DRB).

370 distance above the population average for the duration of our 30 minute imaging window  
 371 (**Figure 6B, Video 5**). We binned time points according to the measured distance between  
 372 Sox2 and SCR and calculated the percent time spent bursting for each bin and found that all  
 373 bins showed similar transcriptional activity (**Figure 6C**). Furthermore, segregating time points  
 374 into bursting and non-bursting frames for each cell demonstrated no significant differences  
 375 between the two groups (**Figure 6D**, Mann-Whitney,  $p = 0.72$ ).

376 We next considered the possibility that Sox2/SCR proximity might precede  
 377 transcriptional bursting by a characteristic time (e.g. due to lags required for transcription  
 378 complex assembly or elongation through the gene body). To this end, we identified the initiation  
 379 point for all bursts in our dataset and considered a 25-minute window centered at each burst  
 380 initiation event. Alignment and meta-analysis of these bursts showed little change in Sox2/SCR  
 381 distance across the time window. To determine if Sox2/SCR distance significantly deviated from  
 382 expected values across transcriptional bursts, we compared aligned bursts to a randomly  
 383 shuffled control dataset and found no significant differences between the burst-centered and  
 384 random-centered analysis (**Figure 6E, Supplementary File 6**). This analysis suggests  
 385 Sox2/SCR proximity and Sox2 transcription is not separated by a characteristic lag within the  
 386 time frame considered.

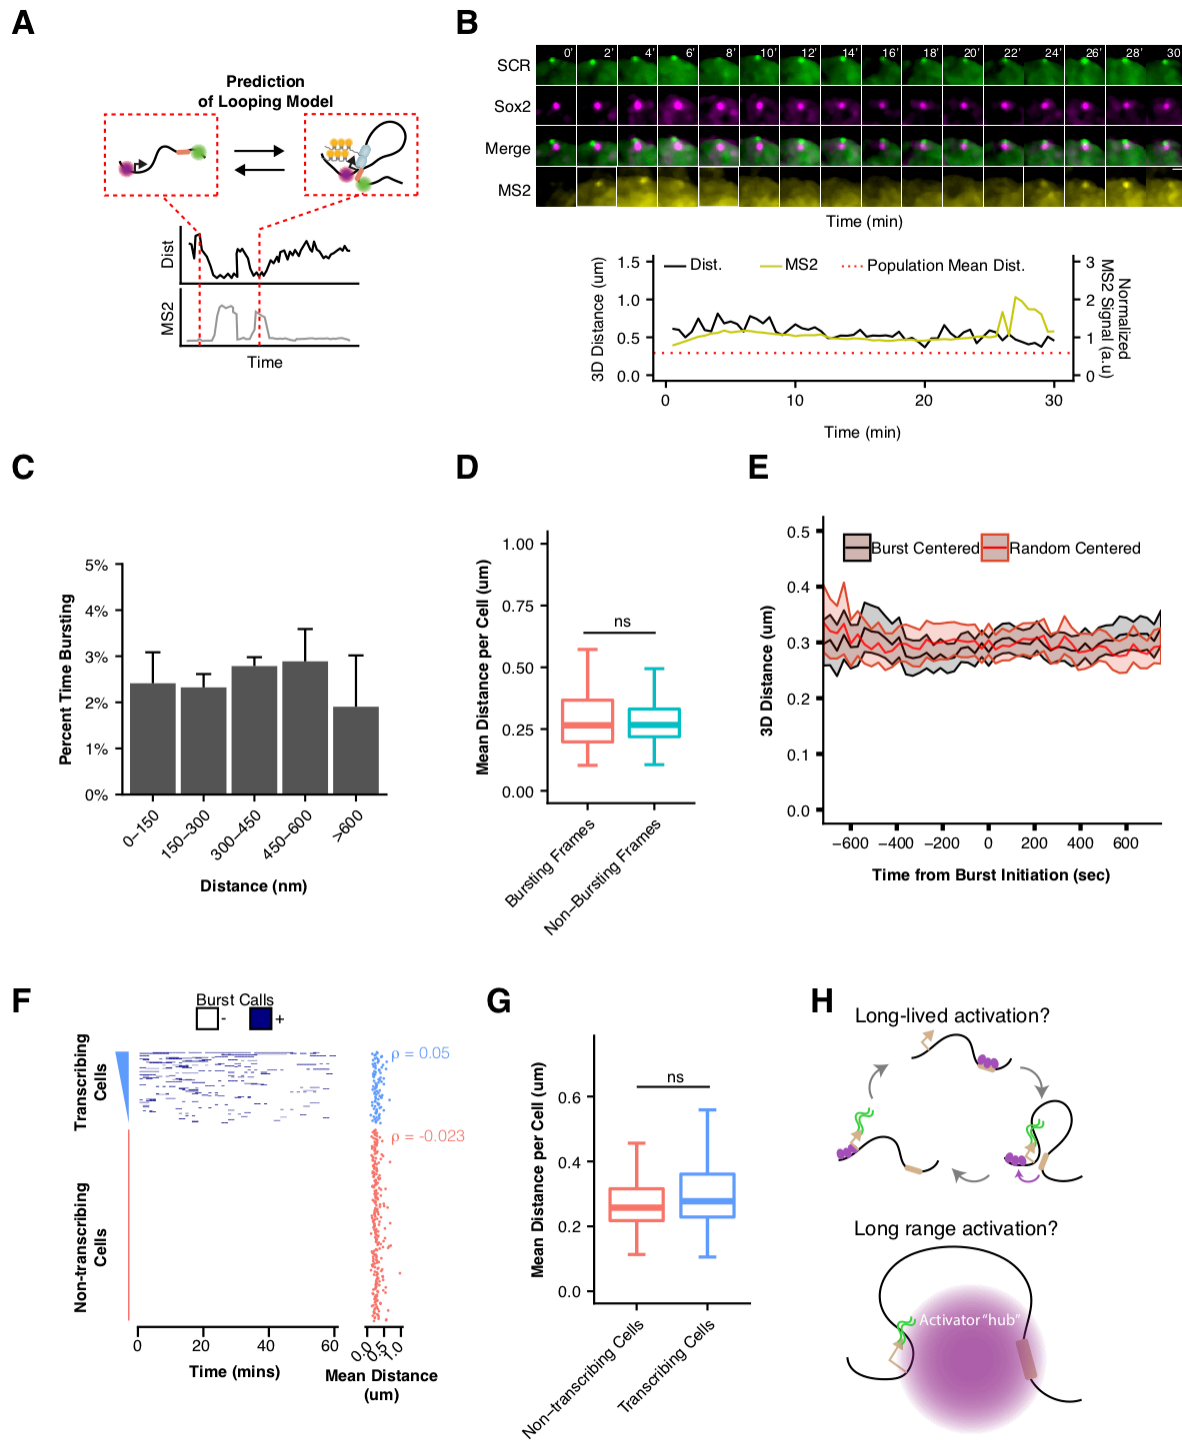

**Figure 6. Sox2 Transcription Is Not Associated with SCR Proximity.** A) Schematic illustrating the expected relation between Sox2/SCR distance and MS2 transcription for a looping enhancer model. B) Maximum-intensity projection images centered on the Sox2 promoter (cuO) show transcriptional activity without correlation to Sox2/SCR distance changes. The measured distance and MS2 signal are shown at bottom. The mean separation distance across the cell population is shown as a dotted red line. Scale bar is 1 um. C) Percent time with Sox2 transcriptional burst as a function of Sox2/SCR distance. Weighted mean + SE for 7 experiments are shown. Weights were determined based on the proportion of frames in each bin contributed by individual experiments. D) Mean separation distance per cell, separated into bursting and non-bursting frames. (Mann-Whitney,  $p = 0.72$ ). E) Mean separation distance across a 25 minute window for all transcriptional bursts (black) or randomly select time points (red), aligned according to the burst initiation frame. Values plotted are mean  $\pm$  95% CI. F) Single cell trajectories of Sox2 transcriptional bursts ranked by number of bursting frames per cell. At right, matched mean separation distances for each cell shown at left. Spearman's correlation coefficient for each is shown. G) Mean separation distance per cell for transcribing and non-transcribing cells. (Mann-Whitney,  $p = 0.12$ ). H) Potential models of SCR regulation of Sox2 that would uncouple Sox2/SCR proximity from transcriptional activity. Above, SCR leads to long-lived activation of the Sox2 promoter that can persist long after Sox2/SCR contact is disassembled. Below, SCR nucleates a large hub of activator proteins that can modify the Sox2 promoter environment despite large distances between Sox2 and SCR.

387 Finally, given the high degree of cell-to-cell variability in *Sox2* locus organization, we  
388 investigated whether cells with greater average *Sox2*-SCR proximity, which would enable more  
389 frequent *Sox2*/SCR encounters, demonstrated higher transcriptional activity. We rank ordered  
390 cells based on cumulative transcriptional activity (i.e. number of transcriptionally active frames)  
391 and compared mean *Sox2*/SCR distance per cell (**Figure 6F**). As expected, non-transcribing  
392 cells showed no correlation between order and distance, given the ordering within this group  
393 was essentially random (Spearman's  $\rho = -0.02$ ). However, transcribing cells also showed no  
394 correlation between transcriptional activity and distance (Spearman's  $\rho = 0.05$ ). As a group,  
395 transcribing cells demonstrated no significant difference in mean *Sox2*/SCR separation distance  
396 compared to non-transcribing cells (**Figure 6G**, Mann-Whitney,  $p = 0.12$ ). These data reveal  
397 little relation between the 3D conformation of *Sox2* relative to the SCR enhancer and its  
398 transcriptional output. These data suggest SCR is unlikely to modulate *Sox2* expression through  
399 a conventional enhancer looping mechanism.

## 400 401 **DISCUSSION**

402 We have investigated the dynamic 3D organization and underlying transcriptional activity  
403 of the established enhancer-gene pair *Sox2* and SCR. Interestingly, we observe few unique  
404 spatial characteristics for *Sox2*/SCR in ESCs; observed distance distributions and their spatial  
405 dynamics for SCR and the *Sox2* promoter region are similar to those observed between SCR  
406 and an equally-spaced non-specific region. In contrast, 3C-based assays have identified  
407 enriched contacts between *Sox2*/SCR as compared to the surrounding neighborhood. We note,  
408 however, that these results need not be incompatible. Proximity ligation (3C) and separation  
409 distance (microscopy) are distinct measures of chromatin structure with unique biases,  
410 assumptions, and limitations, and thus provide snapshots of chromatin architecture that may  
411 differ (Dekker, 2016; Fudenberg and Imakaev, 2017; Giorgetti and Heard, 2016). 3C-based  
412 assays often utilize millions of cells and so may capture rare conformations in the cell  
413 population; these rare conformations would have minimal impact on overall distance  
414 distributions constructed using microscopy. Moreover, it remains unclear what spatial proximity  
415 is required to enable ligation events during 3C, and this property may differ for distinct genomic  
416 regions. Indeed, enrichment of *Sox2*/SCR contacts in 3C assays may reflect only subtle  
417 differences in very proximal conformations (e.g.  $< 50$  nm), conformations unlikely to be captured  
418 by our microscopy measurements due to technical limitations in localization resolution.  
419 Alternatively, large macromolecular bridges or hubs may enable crosslinking and ligation over  
420 larger distances that need not demonstrate pronounced spatial proximity, as recently  
421 demonstrated (Quinodoz et al., 2018). Moreover, chromatin composition and accessibility are  
422 likely to influence crosslinkability, distances permissive for proximity ligation, as well as spatial  
423 distances between probes. These characteristics raise important sources of uncertainty in how  
424 these measures translate to underlying chromatin structure. Thus, while a comprehensive  
425 picture of *Sox2* locus organization remains out of view, our study provides guidance as to what  
426 structures are unlikely. For instance, the absence of enhanced proximity between the *Sox2* and  
427 SCR pair suggests a prolonged, proximal conformation established by stable, direct pairing of  
428 the *Sox2* promoter with SCR is unlikely to be the predominant structure in ESCs.

429 Surprisingly, we also observe no association between *Sox2*/SCR proximity and *Sox2*  
430 transcription in real time. Indeed, we detect no correlation between transcriptional activity and  
431 instantaneous *Sox2*/SCR distances, no reduction in *Sox2*/SCR distances prior to transcriptional  
432 bursts, and no tendency for transcriptionally active cells to display reduced *Sox2*/SCR distance.  
433 These results strongly suggest that direct interactions between *Sox2* and SCR do not lead to  
434 contemporaneous transcriptional activity of the *Sox2* gene, a central feature of enhancer looping  
435 models.

436 The *Sox2* locus displays distinct behavior from an enhancer reporter recently used to  
437 explore the regulatory logic of the even-skipped (*eve*) enhancers in *Drosophila* embryos. In this  
438 study, the authors integrated an enhancer reporter ~142 kb upstream of *eve* locus and  
439 promoted pairing between the two loci by including an ectopic insulator sequence, which pairs  
440 with a similar sequence embedded near the *eve* enhancers. In this system, the authors observe  
441 both bimodality in distance measurements as well as clear correlation between enhancer-

442 reporter proximity and reporter transcription. While it is not yet clear why these systems behave  
443 so differently, we note the considerable differences in the 3D distances we report for Sox2 (339  
444 nm for Sox2/SCR) and those reported for the even-skipped reporter (709 nm for unpaired and  
445 353 nm for paired). It seems plausible that the more extended conformation of the *Drosophila*  
446 chromosome necessitates pairing in order to bring the *eve* enhancer sufficiently close the  
447 reporter, particularly for enhancers evolved to function within 10 kb of their target gene. Our  
448 analysis suggests that most Sox2/SCR loci sample this distance range, perhaps lowering the  
449 importance of locus conformation for SCR function. Indeed, SCR transcriptional control does  
450 demonstrate proximity dependence on some scale, as SCR ablation is not compensated for by  
451 a normal copy located on the homologous chromosome (Li et al., 2014; Zhou et al., 2014). In  
452 other contexts, such as during olfactory receptor gene choice or transvection in *Drosophila*,  
453 regulation can occur over very large distances in *cis* (~ 80 Mb) or in *trans*, and transcriptional  
454 activity may be more closely tied to pairing events that promote spatial proximity, as recently  
455 demonstrated for the latter (Horta et al., 2018; Lim et al., 2018; Markenscoff-Papadimitriou et  
456 al., 2014). Hence, genomic interactions and other features of genome topology may differ in  
457 importance depending of the spatial distances navigated by enhancer-gene pairs.

458 What essential function SCR plays in Sox2 transcription remains unclear, but we  
459 propose two mutually non-exclusive models that can account for our observations: 1) long-lived  
460 activation of the Sox2 locus and promoter by SCR and/or 2) Sox2/SCR communication across  
461 measurable 3D distances. For example, SCR might induce long-lived Sox2 activation through  
462 direct contacts with the promoter region, which could persist after disassembly of these  
463 interactions (**Figure 6H, top**). This mechanism might be achieved through delivery of durable  
464 factors (e.g. chromatin modifiers) to the Sox2 promoter during contact. Indeed, this mechanism  
465 could explain why disruption of DNA loops genome-wide through acute RAD21 degradation  
466 leads to only modest changes in nascent transcription after 6 hours (Rao et al., 2017). In  
467 addition, numerous mechanisms for long-range communication between enhancers and  
468 promoters have been proposed (Bulger and Groudine, 2010). For example, SCR may play a  
469 critical role in the nucleation and spreading of important epigenetic activators and chromatin  
470 accessibility, establishing a permissive environment of Sox2 transcription. An intriguing  
471 mechanism for action at a distance comes from recent observations that super-enhancers are  
472 capable of nucleating large (>300 nm), phase-separated condensates of coactivators, chromatin  
473 regulators, and transcription complexes (Cho et al., 2018; Sabari et al., 2018). SCR is a bona  
474 fide super-enhancer in ESCs (Whyte et al., 2013). Thus, SCR may deliver activation factors  
475 over hundreds of nanometers through inclusion of the Sox2 promoter into an activator hub or  
476 condensate (**Figure 6H, bottom**). Future studies that couple visualization of the Sox2 locus with  
477 that of important molecular components of transcriptional activation will provide critical insights  
478 regarding how, when, and over what distances these factors function at this critical pluripotency  
479 gene.

480

## 481 **MATERIALS AND METHODS**

### 482 **ESC Culture**

483 129/CastEiJ F1 hybrid mouse embryonic stem cells were maintained in 2i + Lif media,  
484 composed of a 1:1 mixture of DMEM/F12 (Thermo Fisher Waltham, MA, #11320-033) and  
485 Neurobasal (Thermo Fisher #21103-049) supplemented with N2 supplement (Thermo Fisher  
486 #17502-048), B27 with retinoid acid (Thermo Fisher #17504-044), 0.05% BSA (Thermo Fisher  
487 #15260-037), 2 mM GlutaMax (Thermo Fisher #35050-061), 150  $\mu$ M 1-thioglycerol (Sigma St.  
488 Louis, MO, M6145), 1  $\mu$ M PD03259010 (Selleckchem Houston, TX, #1036), 3  $\mu$ M CHIR99021  
489 (Selleckchem #S2924) and  $10^6$  U/L leukemia inhibitory factor (Peprotech Rocky Hill, NJ, #250-  
490 02). Media was changed daily and cells were passaged every 2 days.

491

### 492 **ESC Genome Modification**

493 For insertion of PhiC31 and Bxb1 attP sequences, 150,000 cells were electroporated  
494 with 1  $\mu$ M of single-stranded oligonucleotide donor containing the attP sequence and 400 ng of  
495 the sgRNA/Cas9 dual expression plasmid pX330 (a gift from Feng Zhang, Addgene Plasmid  
496 #42230) using the Neon Transfection System (Thermo Fisher). Neon settings for the

497 electroporation were as follows: 1400V, 10ms pulse width, 3 pulses. Electroporated ESCs were  
498 given 3 days to recover, followed by seeding approximately 5000 cells on a 10cm dish for clone  
499 isolation (see Clone Isolation).

500 For integration of the tetO and cuO array, 150,000 cells were electroporated with 300ng  
501 each of 1) a tetOx224 repeat plasmid bearing a PhiC31 attB sequence and a FRT-flanked  
502 neomycin resistance cassette, 2) a cuOx144 repeat (approximate) plasmid bearing a Bxb1 attB  
503 sequence and a floxed puromycin or blasticidin resistance cassette, 3) an expression plasmid  
504 for the PhiC31 integrase (a gift from Philippe Soriano, Addgene Plasmid #13795), and 4) an  
505 expression plasmid for the Bxb1 integrase using the Neon Transfection System. Electroporated  
506 ESCs were allowed to recover for 3 days, followed by 7 days of drug selection using 500 ug/mL  
507 G418 and either 1 ug/mL puromycin or 8 ug/mL blasticidin in antibiotic-free media. After drug  
508 selection, cells were electroporated again with 400 ng each of Cre and Flpo expression  
509 plasmids to remove the resistance cassettes. 3 days after electroporation, approximately 5000  
510 cells were seeded on a 10cm plate for clone isolation (see Clone Isolation).

511 For targeting of the MS2 reporter construct into the endogenous Sox2 allele, we  
512 generated a targeting plasmid that inserted a P2A sequence followed by the puromycin  
513 resistance gene upstream of the endogenous Sox2 stop codon with 1kb homolog arms on either  
514 side. We next mutated the PAM sequence for our sgRNA in the 3' homology arm by site-  
515 directed mutagenesis. 24 repeats of the MS2 hairpin sequence were inserted into an EcoRI  
516 restriction site located just 3' of the puromycin stop codon. 150,000 cells were electroporated  
517 with 400ng of targeting plasmid and 400ng of pX330 expressing the appropriate sgRNA.  
518 Electroporated ESCs were given 3 days to recover, followed by 5 days of puromycin selection.  
519 Approximately 5000 cells were subsequently seeded on a 10cm dish for clone isolation (see  
520 Clone Isolation). A positive clone was identified by PCR. DNA sequencing confirmed no  
521 mutations in the Sox2-P2A-puro<sub>r</sub> cassette and identified a single bp deletion in the 3' UTR of the  
522 non-targeted CastEiJ allele due to residual targeting of a non-canonical NAG PAM.

523 For deletion of the Sox2 Control Region or the Sox2-1-112T fragment, 150,000 cells  
524 were electroporated with 400ng each of pX330 expressing sgRNAs targeting genomic regions  
525 centromeric and telomeric to the deletion fragment. 3 days after electroporation, approximately  
526 5000 cells were seeded on a 10cm plate for clone isolation (see Clone Isolation).

527

### 528 **ESC Clone Isolation**

529 After 5-6 days of growth at low density (~5000 cells per 10 cm dish), individual colonies  
530 were picked and transferred to a 96-well plate. Briefly, colonies were aspirated and transferred  
531 to a well with trypsin, followed by quenching and dissociation with 2i+Lif+5%FBS. Once the 96-  
532 well plate had grown to confluency, we split the clones into 2 identical 96-well plates. One plate  
533 was frozen at -80°C by resuspending the clones in 80% FBS/20% DMSO freezing media. The  
534 second plate was used for DNA extraction. All wells were washed once with PBS and  
535 subsequently lysed overnight at 55°C in a humidified chamber with 50 uL lysis buffer (10 mM  
536 Tris-HCl, pH 8.3, 50 mM KCl, 1.5 mM MgCl<sub>2</sub>, 0.45% NP40, 0.45% Tween 20, 100 ug/mL  
537 Proteinase K). Genomic DNA was concentrated by ethanol precipitation and resuspended in  
538 100 uL of double distilled water. 1 uL of suspension was used for subsequent PCR screening  
539 reactions using GoTaq Master Mix (Promega Madison, WI, #M7123).

540

### 541 **Stable Expression of Fluorescent Transgenes**

542 To generate stable lines expressing CymR, TetR, and MS2cp fluorescent protein  
543 fusions, 150,000 cells were electroporated with 400ng of an ePiggyBac Transposase  
544 expression plasmid (a gift from Ali Brivanlou) and 50ng of expression plasmid bearing PiggyBac  
545 terminal repeats. 7 days after electroporation, fluorescent cells were resuspended in  
546 fluorescence-activated cell sorting (FACS) buffer (5% FBS in PBS) and purified via FACS using  
547 a FACSAria II (BD). To enrich cells expressing the CymR-Halox2 fusion protein, ESCs were  
548 incubated in 100 nM of Janeila Fluor 646 (a gift from Luke Lavis) for 30 minutes at room  
549 temperature, washed once in FACS Buffer, incubated for 30 minutes at room temperature in

550 FACS Buffer, washed again, and sorted using a FACSAria II.

551

### 552 **Isolation of Neural Progenitor Cells from ESCs**

553 ESCs were passaged onto gelatinized 6 wells at 50,000-100,000 cells. The following  
554 day, these cultures were switched to N2B27 media (1:1 composition of DMEM/F12 and  
555 Neurobasal, N2 supplement, B27 with retinoic acid, 0.05% BSA, 2 mM GlutaMax, 150 uM 1-  
556 thioglycerol, 25 ug/mL insulin (Sigma #I6634)). After 4 days, we dissociated the cultures and  
557 seeded 1 million cells in an ungelatinized 10 cm dish in N2B27 with 10 ng/mL FGF basic (R&D  
558 Systems Minneapolis, MN, #233-FB) and 10 ng/mL EGF (Peprotech #315-09) to form  
559 neurospheres. After 3-4 days of outgrowth, neurospheres were collected by gentle  
560 centrifugation (180xg, 3 minutes) and plated onto a pre-gelatinized 6 well. Neural progenitor cell  
561 (NPCs) lines were established by passaging (4-6 passages). For maintenance of NPCs, cells  
562 were cultured on wells pre-treated with poly-D-lysine and 4 ug/mL natural mouse laminin  
563 (Invitrogen #23017015) in N2B27 with 10ng/mL FGF basic and 10 ng/mL EGF and passaged  
564 every 4-5 days.

565

### 566 **Differentiation of NPCs to neurons and astrocytes**

567 To differentiate NPCs to astrocytes, 30,000 cells were plated onto coverglass within a 24  
568 well pre-treated with poly-D-lysine and laminin. The following day, cells were switched to N2B27  
569 with 10 ng/mL BMP4 (R&D Systems #314-BP) and allowed to differentiate for 12 days.

570 To differentiate NPCs to neurons, 30,000 cells were plated onto coverglass within a 24  
571 well pre-treated with poly-D-lysine and laminin. The following day, cells were switched to N2B27  
572 with 10 ng/mL FGF basic and allowed to differentiate for 6 days. Cells were then switched to  
573 N2B27 without additional factors and grown for 6 days.

574

### 575 **Differentiation of Cardiogenic Mesodermal Precursors from ESCs**

576 ESCs were dissociated and seeded to form embryoid bodies at 1 million cells per dish in  
577 SFD media (3:1 composition of IMDM (Thermo Fisher #12440-053) and Ham's F12 (Thermo  
578 Fisher #11765-054), N2 supplement, B27 without retinoic acid (Thermo Fisher #12587-010),  
579 0.05% BSA, 2 mM GlutaMax, 50 ug/mL ascorbic acid (Sigma #A-4544), 450 uM 1-thioglycerol).  
580 After 2 days, EBs were dissociated and reaggregated at 1 million cells per dish in SFD media  
581 with 5ng/mL VEGF (R&D Systems #293-VE), 5 ng/mL Activin A (R&D Systems #338-AC), and  
582 0.75 ng/mL BMP4 to induce cardiogenic mesoderm. 40hrs after induction, cells were  
583 dissociated and stained for Flk1 and PDGFR $\alpha$ . Briefly, cells were wash four times in FACS  
584 Buffer, followed by incubation for 30 minutes with a biotinylated anti-FLK-1 antibody (Hybridoma  
585 Clone D218, 1:100). Cells were then washed three times with FACS Buffer and incubated with a  
586 PE-conjugated anti-PDGFR $\alpha$  (Thermo Fisher #12-1401-81, 1:400) and APC-Streptavidin (BD  
587 Biosciences Franklin Lakes, NJ, #554067, 1:200) for 30 minutes at room temperature. Cells  
588 were then washed two times with FACS Buffer and sorted for FLK1<sup>+</sup>/PDGFR $\alpha$ <sup>+</sup> cells.

589

### 590 **Immunofluorescence**

591 NPCs or differentiated astrocytes/neurons on coverglass were fixed for 10 minutes at  
592 room temperature with 4% paraformaldehyde in PBS. After fixing, the coverglass were washed  
593 twice with PBS, permeabilized in PBS with 0.5% Triton X-10 for 10 minutes, and washed once  
594 in PBS with 0.1% Triton. Cells were then blocked for 1 hour at room temperature in PBS/0.1%  
595 Triton/4% goat serum. After blocking, coverglass were incubated in primary antibody in  
596 PBS/0.1% Triton/4% goat serum overnight at 4°C in a humidified chamber. Coverglass were  
597 subsequently washed three times with PBS/0.1% Triton and incubated in secondary antibody in  
598 PBS/0.1% Triton/4% goat serum at room temperature for 1 hour. After secondary incubation,  
599 coverglass were washed three times with PBS/0.1% Triton, stained with DAPI in PBS (1 ug/mL),  
600 and mounted on a slide for imaging in mounting medium (1x PBS, pH7.4, 90% glycerol, 5  
601 mg/mL propyl gallate). Antibodies used were anti-SOX2 (Santa Cruz Biotechnology Dallas, TX,  
602 #sc-365823, Lot# K1414), anti-PAX6 (Biolegend San Diego, CA, #901301, Lot# B235967), anti-  
603 TUBB3 (Biolegend #801201, Lot# B199846), and anti-GFAP (Sigma #G3893, Lot#



604 105M4784V).

605

## 606 **Western Blotting**

607 3 million cells were collected, washed once with PBS, and lysed in 4x Laemmli Buffer.  
608 Protein lysate was passed through a 30 gauge needle twenty times to shear the genomic DNA  
609 and the lysate was cleared by centrifugation at 13,000 RPM for 10 minutes at 4°C.  
610 Subsequently, lysate was supplemented with 100 mM DTT and boiled at 95°C for 10 minutes.  
611 200,000 cells of protein lysate were loaded onto a Bis-Tris 4-12% polyacrylamide gels  
612 (ThermoFisher #NW04120BOX) and electrophoresis was carried out using the Bolt system  
613 (ThermoFisher). Protein was transferred to a PVDF membrane. Membranes were blocked for 1  
614 hour at room temperature with 4% milk PBS Tween (PBST). Membrane was subsequently  
615 incubated in primary antibody overnight in 4% milk PBST at 4°C. Membranes were then washed  
616 four times 15 minutes at room temperature in PBST and incubated in secondary antibody in 4%  
617 milk PBST for 1 hour at room temperature. After secondary incubation, membranes were  
618 washed four times 15 minutes at room temperature in PBST, incubated in SuperSignal  
619 chemiluminescence HRP substrate (ThermoFisher #34075), and visualized by film exposure.  
620 Antibodies used were anti-SOX2 (Santa Cruz #sc-365823, Lot# K1414) and anti-β-actin (Abcam  
621 Cambridge, UK, ab8227, Lot# GR92448-1).

622

## 623 **Quantitative PCR**

624 RNA was extracted from 500,000-1,000,000 cells using TRIzol and 200ng of RNA  
625 was reversed transcribed using the QuantiTect Reverse Transcription kit (Qiagen Hilden,  
626 Germany). Quantitative PCR was performed on 8ng cDNA in technical triplicates using TaqMan  
627 Gene Expression Master Mix (ThermoFisher #4369016) on a 790HT Fast Real-Time PCR  
628 System (ThermoFisher). The primer and probe sets used are as follows:

629 Sox2 Forward primer – 5'CTACGCGCACATGAACGG3',  
630 Sox2 Reverse primer – 5'CGAGCTGGTCATGGAGTTGT3',  
631 Sox2 129 allele probe – /56-FAM/CAACCGATG/ZEN/CACCGCTACGA/3IABkFQ/,  
632 Sox2 CastEiJ allele probe – /56-FAM/CAGCCGATG/ZEN/CACCGATACGA/3IABkFQ/,  
633 Tbp Forward primer – 5'ACACTCAGTTACAGGTGGCA3',  
634 Tbp Reverse primer – 5'AGTAGTGCTGCAGGGTGATT3',  
635 Tbp probe - /56-FAM/ACACTGTGT/ZEN/GTCCTACTGCA/3IABkFQ.  
636 56-FAM = Fluorescein  
637 ZEN = internal quencher (IDT)  
638 3IABkFQ = 3' Iowa Black quencher

639

## 640 **Live-Cell Microscopy**

641 We imaged all live-cell experiments on a Nikon Ti-E microscope and the following setup  
642 for live, spinning disk confocal microscopy: Yokogawa CSU-22 spinning disk, 150 mW Coherent  
643 OBIS 488 nm laser, 100 mW Coherent OBIS 561 nm laser, 100 mW Coherent OBIS 640 nm  
644 laser, a Yokogawa 405/491/561/640 dichroic, zET405/488/561/635m quad pass emission filter,  
645 Piezo Z-drive, Okolab enclosure allowing for heating to 37°C, humidity control, and CO<sub>2</sub> control,  
646 and a Plan Apo VC 100x/1.4 oil immersion objective. Image acquisition utilized either a  
647 Photometric Evolve Delta EMCCD or an Andor iXon Ultra EMCCD camera.

648 ESCs were plated one day prior to imaging on a 8-chambered coverglass (VWR Radnor,  
649 PA, #155409) pretreated for at least 2 hours with 3.1 ug/mL Laminin-511 (iWachem Tokyo,  
650 Japan #N-892011) at 120,000 cells per chamber. Just prior to imaging, 2i+Lif media was pre-  
651 mixed with 50 ug/mL ascorbic acid and a 1:100 dilution of Prolong Live Antifade Reagent  
652 (ThermoFisher P36975). If the cells to be imaged also expressed CymRHalox2, 100 nM of  
653 JF646 was also added to the media. After a one hour incubation, we added this media to the  
654 ESCs to be imaged.

655 NPCs were plated at least 8 hours prior to imaging on a 8-chambered coverglass pre-  
656 treated with poly-D-lysine and laminin at 120,000 cells per chamber. Prior to imaging, N2B27  
657 with FGF basic and EGF was pre-mixed with 50 ug/mL ascorbic acid and a 1:100 dilution of  
658 Prolong Live Antifade Reagent. After a one hour incubation, we added this media to the NPCs

659 to be imaged.

660 Cardiogenic mesodermal cells enriched by FACS for FLK1 and PDGFR $\alpha$  were plated on  
661 8-chambered coverglass precoated with 0.1% gelatin in StemPro-34 (Thermo Fisher #10639-  
662 011) supplemented with 2 mM GlutaMax, 50 ug/mL ascorbic acid, 5 ng/mL VEGF, 10 ng/mL  
663 FGF basic, and 25 ng/mL FGF10 (R&D Systems #345-FG) and cultured for 24 hours. Just prior  
664 to imaging, StemPro-34 media (with the additives listed above) was supplemented with a 1:100  
665 dilution of Prolong Live Antifade Reagent, incubated for one hour, and subsequently added to  
666 the cultures for imaging.

667 For imaging dual color experiments (CymRGFP and TetRtdTom), we captured  
668 alternating green and red images for each plane by toggling the 488 nm and 561 nm lasers,  
669 enabling fast acquisition of both colors and minimal time between images (30ms exposure). A z-  
670 series of two color planes was acquired by moving between planes quickly using the Piezo Z-  
671 drive. For imaging tri-color experiments (CymRHalox2-JF646, TetRGFPx2, tdMS2cp-tagRFP-  
672 Tx2), we imaged the green and far red channels as above (toggling the 488 nm and 640 nm  
673 lasers), followed by a second pass through all z planes with the 561 nm after a ET525/50m  
674 emission filter was inserted in the light path. This eliminated bleed-through signal from the  
675 JF646 dye during 561 nm excitation allowed by the quad pass emission filter. All images were  
676 acquired using  $\mu$ Manager (Edelstein et al., 2010).

677 Imaging data for each condition is composed of a minimum of three imaging sessions,  
678 except for cardiogenic mesodermal cultures, in which duplicate differentiations were performed.

679

## 680 **Image Processing**

681 Images were background subtracted using a dark image, converted to 32-bit, and  
682 denoised using NDSafir (Carlton et al., 2010; Kervrann and Boulanger, 2006). Denoised images  
683 were reverted back to 16-bit, fluorescence bleach corrected using exponential fitting, and  
684 despeckled to remove high-frequency noise using ImageJ (Schindelin et al., 2012; Schneider et  
685 al., 2012).

686

## 687 **Image Analysis**

### 688 *Tracking Loci*

689 Maximum Z-projections of 3D time series were manually analyzed to identify cuO/CymR  
690 and tetO/TetR spots in nuclei and annotate individual loci as doublets (likely two sister  
691 chromatids) or singlets. Loci that showed any frames with doublet spots for either channel were  
692 not included in downstream analysis. For each Sox2 locus with well-behaved singlets, an ROI  
693 was drawn that included the locus location throughout the timecourse (or if the locus became  
694 untrackable from leaving the field of view, the duration of its visibility). In some cases (e.g.  
695 NPCs), multiple ROIs were needed to track a single loci because of large-scale movements of  
696 the cell nucleus. In these cases, location data was merged together after tracking. For each  
697 locus, the 3D location for the cuO/CymR spot and the tetO/TetR spot was tracked within the  
698 delimited ROI using TrackMate (Tinevez et al., 2017). TrackMate tracks for each spot were  
699 manually inspected, and if multiple tracks existed (due to gaps in the tracking), these were  
700 merged through manual curation. Spot positions were shifted by 0.5 pixels and converted to  
701 physical distances using a 0.091 um pixel size and a 0.3um z-step. We corrected for chromatic  
702 aberration by shifting position based on displacements observed using TetraSpeck fluorescent  
703 beads (ThermoFisher #T7279).

704 3D positions of cuO/CymR and tetO/TetR were associated with each Sox2 locus.

705

### 706 *Localization Error Estimation*

707 Tetraspeck (Thermo Fisher T7279) multicolor fluorescent beads were embedded in 2%  
708 agarose and a one hundred frame Z-stack time series was constructed at various laser  
709 intensities. The max spot intensity as well as the mean and standard deviation of the nuclear  
710 background was estimated from ten nuclei for both cuO/CymR and tetO/TetR using our raw  
711 time-lapse data. Bead time series were modified to add background noise using ImageJ to  
712 approximate the nuclear background and then denoised as described above. 9-10 beads that  
713 showed signal within one standard deviation of that observed for either the cuO/CymR or

714 tetO/TetR spots were tracked using TrackMate and the standard deviation of position in the X,  
715 Y, and Z dimensions was computed using a 10 frame sliding window.

716  
717 *Euclidean Distance*

718 1D, 2D, and 3D euclidean distances were calculated using the formula:

719 
$$Dist_{ij} = \sqrt{\sum_{v=1}^n (X_{vi} - X_{vj})^2}$$

720 where  $i$  and  $j$  represent the cuO/CymR and tetO/TetR spot, respectively, and  $n$  the number of  
721 dimensions.

722  
723 *Relative Displacement*

724 The relative position of spot1 (CymRGFP) with respect to spot2 (TetRtTom) for the  $v$ th  
725 dimension was calculated as follows:

726 
$$X_{vi} = (X_{vi} - X_{vj})$$

727 The relative displacement was then calculated as the change in the relative position of spot 1.

728 
$$Disp_t = \sqrt{\sum_{v=1}^n (X_{vi}(t) - X_{vi}(t-1))^2}$$

729 where  $t$  is the current frame and  $n$  is the number of dimensions.

730  
731 *Angle between Displacement Vectors in the XY Plane*

732 We calculated the displacement vectors of two adjacent frames.

733 
$$u = \sqrt{\sum_{v=1}^2 (X_{vi}(t) - X_{vi}(t-1))^2} \quad v = \sqrt{\sum_{v=1}^2 (X_{vi}(t-1) - X_{vi}(t-2))^2}$$

734  
735 where  $t$  is the current frame and  $v$  reflects the dimension. The angle between these vectors was  
736 then calculated by the following:

737 
$$\theta_{xy} = \text{atan2}(\text{det}_{uv}, \text{dot}_{uv})$$

738 where  $\text{atan2}(y, x)$  is the arctan( $y, x$ ) function that uses the sign of  $y$  and  $x$  to determine the  
739 appropriate quadrant for the result and

740  
741 
$$\text{det}_{uv} = \begin{vmatrix} u_x & u_y \\ v_x & v_y \end{vmatrix} = u_x v_y - u_y v_x$$

742  
743 
$$\text{dot}_{uv} = u \cdot v = u_x v_x + u_y v_y$$

744  
745 *Autocorrelation Analysis*

746 Autocorrelation values were calculated according to the formula

747 
$$A(\tau) = \frac{E[(D_t - \mu)(D_{t+\tau} - \mu)]}{\sigma^2}$$

748  
749 where  $D_t$  represents distance at time  $t$ ,  $\tau$  is the time lag,  $\mu$  and  $\sigma^2$  are the average and variance  
750 of 3D distance measured across the cell population, and  $E$  is the expected (i.e. average) value.  
751 Confidence intervals were computed by bootstrapping and recalculating  $A(\tau)$  across 1000  
752 simulations to estimate 95% confidence.

753  
754 *Distribution Distances and Clustering*

755 The distance between 3D distance probability distributions from two cell lines or cell  
756 types was computed using earth mover's distance (EMD). Briefly, the earth mover's distance is  
757 the minimum cost to convert one probability distribution to the other over a defined region. We

758 calculated pairwise EMD for each 3D probability distribution using the R package *earthmvdist*.  
759 Complete-linkage hierarchical clustering was then performed to generate a dendrogram.

760

### 761 *MS2 Signal Identification and Quantification*

762 3D time-lapse images of tdMS2cp-tagRFP-Tx2 were converted into 2D images by  
763 maximum Z projection. For each Sox2 locus considered for analysis, a 20x20 pixel region  
764 centered on the XY tracking position of the cuO/CymR spot, reflecting the position of the Sox2  
765 promoter region, was analyzed for each frame. If tracking information was missing for a given  
766 frame, the position coordinates from the nearest frame were used. This 20x20 region was used  
767 for parameter estimation for 2D Gaussian fitting using the equation:

$$768 \quad f(x, y) = Ae^{-\left(\frac{(x-x_o)^2}{2\sigma_x^2} + \frac{(y-y_o)^2}{2\sigma_y^2}\right)} + C$$

769

770 where  $A$  (Gaussian height),  $x_o, y_o$  (location of Gaussian peak),  $\sigma_x^2, \sigma_y^2$  (Gaussian variance), and  
771  $C$  (offset) are all estimated parameters. Initial estimate of the offset was defined as the median  
772 pixel value in the ROI,  $A$  was estimated as the maximum pixel value minus the estimated offset,  
773  $\sigma_x^2$  and  $\sigma_y^2$  were estimated as 1, and  $x_o, y_o$  was estimated as the location of the brightest pixel in  
774 the ROI. These initial estimates were used attempt a Gaussian fit on a 10x10 pixel region  
775 centered on the estimated Gaussian position. We constrained the potential Gaussian fit to have  
776 a minimum height of 10% above background fluorescence, a fit position of no more than 3  
777 pixels from the estimated position, and a width of no more than 4. Successful Gaussian fits were  
778 filtered for likelihood to reflect true MS2 signal using a k-nearest neighbor model trained on  
779 manually classified data and 4 parameters of the fit ( $A, \sigma_x^2, \sigma_y^2$ , and an  $R^2$  value). Furthermore,  
780 frames were also required to have at least one neighboring frame ( $\pm 3$  frames) also demonstrate  
781 MS2 signal, eliminating high frequency noise. Time points which passed these filter steps were  
782 assigned a relative MS2 Signal based on:

$$783 \quad \text{Signal} = \frac{A + C}{\text{Normalization Factor}}$$

784

785

786 where the normalization factor was the median pixel value for the 20x20 pixel ROI across all  
787 timepoints. For time points that did not pass filter, MS2 signal was taken as the median value of  
788 the 20x20 ROI for the current frame normalized as above.

789

### 790 *Sox2 Burst Classification*

791 Sox2 burst initiation events were classified as frames positive for MS2 signal (see  
792 above) that lack MS2 positive classifications for the preceding three frames. All frames spanning  
793 the burst initiation and the last positive MS2 classification prior to the next burst initiation were  
794 labeled as one burst event.

795

### 796 *Aligned Sox2 Burst Analysis*

797 To align our MS2 data across all Sox2 bursts, a defined window was sampled for each  
798 burst centered on the burst initiation event. We subsequently generated a randomly sampled  
799 control comparison for this analysis by randomly shuffling the frames labeled as burst initiation  
800 events and repeating the analysis. Mean distances or MS2 signal were then calculated based  
801 on relative frame compared to the burst initiation event. Confidence intervals were computed by  
802 bootstrapping and recalculating the mean value for each relative frame across 1000 simulations  
803 to estimate 95% confidence.

804

### 805 *Browser tracks*

806 Unless wiggle files were available as part of the accession, sequencing read archives  
807 (SRA) were downloaded from NCBI and reads were aligned to the mm9 mouse genome using  
808 Bowtie (Langmead et al., 2009) as part of the Galaxy platform (Afgan et al., 2018). Sequences  
809 were extended by 200 bp and allocated into 25 bp bins to generate wiggle files. HiC data was  
810 visualized using JuiceBox (Durand et al., 2016). Browser tracks were visualized on the UCSC

811 Genome browser (Kent et al., 2002).

812

## 813 **FIGURE LEGENDS**

### 814 **Figure 1. The Sox2 Locus As a Model for Visualization of Enhancer-Promoter Regulation in Mouse Embryonic Stem Cells.**

815 **A)** To visualize chromosome loci in living cells, we have  
816 used tetO/TetR and cuO/CymR genetic labels. Our pipeline for insertion of these labels into the  
817 mouse genome is shown. First, CRISPR-Cas9 is used to place an attP intergrase landing site.  
818 Second, a targeting plasmid bearing the compatible attB sequence, the tetO or cuO array, and a  
819 selection cassette is introduced along the integrase (Int) to mediate site-specific integration. The  
820 selection cassette can then be subsequently removed by Cre/Flp recombinase. **B)** The Sox2  
821 locus in mouse ESCs. Genomic browser tracks of epigenomic and expression data demonstrate  
822 high levels of histone acetylation, RNA polymerase II, and transcription factor (OCT4, SOX2,  
823 NANOG, CTCF) occupancy at Sox2 and the distal Sox2 Control Region enhancer (tan boxes).  
824 Data from 4C and HiC experiments demonstrate chromosomal contacts at the Sox2 locus. For  
825 4C data, read density indicates contact frequency with a fixed position near the Sox2 promoter  
826 (red triangle). Y-axis for browser tracks is reads per million. For HiC, all pairwise contact  
827 frequencies are mapped using a heatmap. The intensity of each pixel represents the normalized  
828 number of contacts detected between a pair of loci. The maximum intensity is indicated in red  
829 square. At bottom, locations of the cuO- and tetO-arrays for the three cell lines utilized for this  
830 study. Sox2-8C<sup>cuO/+</sup>; Sox2-117T<sup>tetO/+</sup> (Sox2-SCR) ESCs were used to track Sox2/SCR location.  
831 Two control lines, Sox2-43T<sup>tetO/+</sup>; Sox2-164T<sup>cuO/+</sup> (Control-Control) and Sox2-117T<sup>tetO/+</sup>; Sox2-  
832 242T<sup>cuO/+</sup> (SCR-Control) were analyzed for comparison. H3K27ac, RNA polymerase II (RNAP),  
833 and RNAseq data from GSE47949 (Wamstad et al., 2012); DNase data from GSE51336  
834 (Vierstra et al., 2014); SOX2, OCT4, NANOG, and CTCF data from GSE11431 (Chen et al.,  
835 2008b); 4C data from GSE72539 (de Wit et al., 2015); and HiChIP data from GSE96107 (Bonev  
836 et al., 2017).

837

### 838 **Figure 2. Visualization of the Sox2 Region in ESCs Reveals Minimal Evidence for Sox2/SCR Interactions**

839 **A)** Top, confocal Z slices of CymR-GFP and TetR-tdTom in Sox2-SCR ESCs, labeling the Sox2  
840 promoter and SCR region with bright puncta, respectively. Middle, 3D surface rendering of the  
841 ESC nucleus shown above. A single fluorescence channel was rendered white and transparent  
842 to outline the nucleus, and GFP and tdTom surfaces were rendered with high threshold to  
843 highlight the cuO and tetO arrays, respectively. Bottom, tracking data is rendered for the  
844 nucleus shown above. Inset shows example of calculated 3D separation distance between the  
845 two labels. Scale bar is 1  $\mu$ m. **B)** Normalized histogram of 3D separation distance for Sox2-SCR  
846 ESCs demonstrates a single peak (Hartigan's Dip Test for multimodality,  $p = 1$ ). Schematic for  
847 an hypothetical looping enhancer-promoter pair is shown as an inset, with two peaks. **C)**  
848 Cumulative density of 3D separation distance for Sox2-SCR versus control comparisons. **D)**  
849 Mean 3D separation distance per cell for each label pair. Population means and standard  
850 deviations are shown for each sample. Mann-Whitney, \*  $p < 0.05$ , \*\*  $p < 0.01$ , \*\*\*  $p < 0.001$

852

853 **Figure 3. Sox2 Locus Compacts upon ESC Differentiation.** **A)** ESCs were differentiated into  
854 neural progenitor cells (NPCs), which maintain expression of Sox2 but inactivate the SCR, and  
855 cardiogenic mesodermal precursors (MES), which inactivate both Sox2 and the SCR. **B)**  
856 Browser tracks of H3K27ac and RNA-seq data from ESCs, NPCs, and MES demonstrate the  
857 activation status of Sox2 and SCR in each cell type. Y-axis is 0-5 reads per million for H3K27ac  
858 data and 0-10 reads per million for RNA-seq data. **C)** Cumulative density of 3D separation  
859 distance for Sox2-SCR and two control pairs for NPCs (left) and MES (right). ESC data is  
860 shown for comparison as solid lines on each graph and reproduced from Figure 2C. **D)** Mean  
861 3D separation distance per cell for each label pair, organized by cell type. Statistical analysis is  
862 for each matched pair-wise comparison between cell types. All p-values are below reported  
863 value. Mann-Whitney (\*\*  $p < 0.01$ , \*\*\*  $p < 0.001$ ). H3K27ac data from GSE47949 (Wamstad et  
864 al., 2012) and GSE24164 (Creighton et al., 2010). RNAseq data from GSE47949 and

865 GSE44067 (Zhang et al., 2013).

866

867 **Figure 4. Slow Sox2 Locus Conformation Dynamics Lead to Limited Exploration and**  
868 **Variable Enhancer Encounters**

869 A) Maximum-intensity projection images (top) centered on the *Sox2* locus and associated 3D  
870 distance measurements (bottom) highlight distinct conformations and dynamics of the *Sox2*  
871 locus across cells. Scale bar is 1  $\mu$ m. B) 3D separation distance measurements for individual  
872 cells for *Sox2*-SCR, Control-Control, and SCR-Control highlight the heterogeneity of *Sox2* locus  
873 organization across the cell population. The three cells depicted in A are boxed. C) Cartoon  
874 description of autocorrelation analysis. Distance measurement between two time points are  
875 correlated using population statistics, revealing the time scale over which local measurements  
876 diverge from the population mean. A cell with low autocorrelation will randomly fluctuate around  
877 the population mean, leading the autocorrelation function to quickly decay to zero. A cell with  
878 high autocorrelation will deviate substantially from the expected value, only slowly relaxing back  
879 to the population mean. In this case, the autocorrelation function will stay significantly above  
880 zero for large lag times. D) Autocorrelation function for *Sox2*-SCR, Control-Control, and SCR-  
881 Control pairs demonstrates significant autocorrelation at large lag times, indicating significant  
882 memory in 3D conformation across a 20 minute window. The plotted values are mean  $\pm$  95% CI.  
883 E) Percent of cells with an encounter between *Sox2* and SCR (defined as within 100 nm) shown  
884 as a function of the initial separation distance measured for the cell. Likelihood of an encounter  
885 is sharply dependent on the initial conformation of the locus.

886

887 **Figure 5. Visualizing Sox2 Expression in Single Living ESCs Reveals Intermittent Bursts**  
888 **of Transcription.** A) *Sox2* locus with cuO-labeled *Sox2* promoter and tetO-labeled SCR was

889 further modified to introduce an MS2 transcriptional reporter cassette into the *Sox2* gene.  
890 Transcription of *Sox2* leads to visible spot at the *Sox2* gene due to binding and clustering of  
891 MS2 coat protein to the MS2 hairpin sequence. B) Maximum-intensity projection images  
892 centered on the *Sox2* promoter (cuO) show intermittent bursts of MS2 signal, which are  
893 quantified on the right. Scale bar is 1  $\mu$ m. C) Single cell trajectories of *Sox2* transcriptional  
894 bursts as representatively shown in B. D) Aligned *Sox2* transcriptional bursts. Randomly  
895 selected *Sox2* bursts are shown as color traces ( $n = 50$ ). Black line is mean MS2 signal for all  
896 annotated bursts. E) Percent time *Sox2* transcriptional bursting for various experimental  
897 conditions. Bars are mean  $\pm$  standard error of  $\geq 3$  independent experiments. *Sox2*<sup>MS2/+</sup> indicates  
898 cell line harbors the *Sox2*-MS2 reporter allele. SCR<sup>del/+</sup> indicates presence of an SCR deletion *in*  
899 *cis* with the *Sox2*-MS2 reporter. DRB indicates treatment with the transcriptional inhibitor 5,6-  
900 Dichloro-1- $\beta$ -D-ribofuranosylbenzimidazole (DRB).

901

902 **Figure 6. Sox2 Transcription Is Not Associated with SCR Proximity.** A) Schematic  
903 illustrating the expected relation between *Sox2*/SCR distance and MS2 transcription for a  
904 looping enhancer model. B) Maximum-intensity projection images centered on the *Sox2*  
905 promoter (cuO) show transcriptional activity without correlation to *Sox2*/SCR distance changes.  
906 The measured distance and MS2 signal are shown at bottom. The mean separation distance  
907 across the cell population is shown as a dotted red line. Scale bar is 1  $\mu$ m. C) Percent time with  
908 *Sox2* transcriptional burst as a function of *Sox2*/SCR distance. Weighted mean + SE for 7  
909 experiments are shown. Weights were determined based on the proportion of frames in each  
910 bin contributed by individual experiments. D) Mean separation distance per cell, separated into  
911 bursting and non-bursting frames. (Mann-Whitney,  $p = 0.72$ ). E) Mean separation distance  
912 across a 25 minute window for all transcriptional bursts (black) or randomly select time points  
913 (red), aligned according the burst initiation frame. Values plotted are mean  $\pm$  95% CI. F) Single  
914 cell trajectories of *Sox2* transcriptional bursts ranked by number of bursting frames per cell. At  
915 right, matched mean separation distances for each cell shown at left. Spearman's correlation  
916 coefficient for each is shown. G) Mean separation distance per cell for transcribing and non-  
917 transcribing cells. (Mann-Whitney,  $p = 0.12$ ). H) Potential models of SCR regulation of *Sox2* that  
918 would uncouple *Sox2*/SCR proximity from transcriptional activity. Above, SCR leads to long-  
919 lived activation of the *Sox2* promoter that can persist long after *Sox2*/SCR contact is

920 disassembled. Below, SCR nucleates a large hub of activator proteins that can modify the Sox2  
921 promoter environment despite large distances between Sox2 and SCR.  
922

## 923 SUPPLEMENTAL FIGURE LEGENDS

### 924 **Figure 1—figure supplement 1. Characterization of Modified Embryonic Stem Cell Lines.**

925 **A)** Schematic of modified cell lines used in this study. Primer sets used to amplify recombination  
926 arms for tetO- and cuO- integration are shown. **B,C)** PCR genotyping of ESC lines shown in A.  
927

### 928 **Figure 1—figure supplement 2. Sox2 Expression Characterization for Modified**

929 **Embryonic Stem Cell Lines. A)** Ratio of Sox2 expression from the 129 allele and the CastEiJ  
930 allele measured by qPCR for modified ESC lines. B) Sox2 expression relative to control gene  
931 (Tbp) for various cell lines. E14 mESCs, which lack the CastEiJ allele, are included to  
932 demonstrate specificity of allele-specific qPCR assay. Deletion of SCR region leads to loss of  
933 expression from the Sox2 allele *in cis*. N.D. is not detected.  
934

### 935 **Figure 2—figure supplement 1. Estimate Localization Precision for cuO and tetO. A-B)**

936 Histograms of X, Y, and Z position uncertainty for fluorescent beads with signal-to-noise ratios  
937 comparable to cuO/CymR-GFP (A) or tetO/TetR-tdTom (B). Data plotted are the standard  
938 deviation values measured using 10 frame sliding windows collected from 9-10 beads. Error  
939 bars show mean and standard deviation of the computed position uncertainties, which are  
940 reported in the upper right of each panel.  
941

### 942 **Figure 2—figure supplement 2. Tracking Lengths for tetO and cuO Spots Across Cell**

943 **Lines. A-B)** Histograms of the cuO-array (A) or tetO-array (B) Track lengths for cell lines used  
944 in the study as ESCs, NPCs, and MES. Tracking lengths were often shorter in NPCs or MES  
945 due to increased nuclear movement in these cell types compared to ESCs.  
946

### 947 **Figure 3—figure supplement 1. Characterization of ESC-derived Neural Progenitor Cell**

948 **Lines. A)** Immunofluorescence of fixed neural progenitor cells (NPCs) for the NPC markers  
949 SOX2 and PAX6. B-C) Immunofluorescence for the neuron marker  $\beta$ 3-tubulin (B) or the  
950 astrocyte marker GFAP (C) on fixed cultures after 12 days of differentiation towards neurons or  
951 astrocytes, respectively. Scale bar is 100 $\mu$ m.  
952

### 953 **Figure 3—figure supplement 2. SCR Inactivation Does Not Drive Locus Compaction Upon**

954 **Differentiation. A)** Potential models for Sox2 locus compaction observed upon differentiation to  
955 NPCs or MES. At left, cellular differentiation may lead to global changes in chromatin structure  
956 that are not dependent of Sox2/SCR activation status. Alternatively, Sox2 and SCR inactivation  
957 could lead to changes to chromatin structure within the Sox2 locus, driving locus-specific  
958 compaction. **B)** Strategy for CRISPR/Cas9-mediated SCR deletion. Two gRNAs were designed  
959 to flank the SCR region and generate a large deletion of SCR. Below, the SCR deletion allele  
960 shows a novel junction near the locations of expected Cas9 cutting, indicating a loss of the  
961 intervening SCR sequence. **C)** Scatterplot of mean and standard deviation of 3D distance  
962 measurements for each cell line visualizes similarity between Sox2 label pairs across cell types.  
963 **D)** Dendrogram visualizing hierarchical clustering of Earth Mover's distances between 3D  
964 separation distance histograms of distinct Sox2 label pairs across cell types. SCR-deleted ESCs  
965 show greatest similarity to other ESCs as opposed to differentiated cells with inactivation of the  
966 SCR element.  
967

### 968 **Figure 4—figure supplement 1. Dynamics Statistics for Each Sox2 Locus Pair in ESCs. A-**

969 **B)** Normalized histograms of relative step size and change in 3D separation distance for  
970 adjacent frames. Mean value is highlighted by a red line. C) Measurement of the XY plane angle  
971 made between two successive displacement vectors demonstrates pronounced bias towards a  
972 locus "bouncing back" to its position preceding a given step. Statistical test for bias was  
973 performed using Kuiper's Test for Uniformity. \*\* is  $p < 0.01$ .  
974

975 **Figure 5—figure supplement 1. Generation and Characterization of Sox2-MS2**  
976 **Transcriptional Reporter ESCs. A)** Targeting strategy for Sox2 transcriptional reporter. A  
977 targeting plasmid was used with Sox2 homology arms and a P2A peptide puromycin resistance  
978 gene cassette (2Apuro) inserted in frame with Sox2. Downstream of 2A puro is a 24x MS2 stem  
979 loop array, which is inserted into the 3' UTR. **B)** PCR genotyping assay to identify a targeted  
980 Sox2 allele. A primer set was used that recognized the MS2 stem loop array and a genomic  
981 region downstream of the 3' homology arm. **C)** Western blotting for SOX2 protein in parental  
982 129/CastEiJ ESCs or ESCs heterozygous for the Sox2-MS2 allele. Actin was used as a loading  
983 control. **D)** Normalized histogram of the percentage of time individual cells have a detectable  
984 Sox2 transcriptional burst.

#### 985 **SUPPLEMENTAL FILE LEGENDS**

986 **Supplementary File 1. Primer Sequences Used in Cell Line Characterization.** List of PCR  
987 primer sequences and expected amplicon size used in the study. Brief description of the  
988 purpose of each primer pair is included.  
989

990 **Supplementary File 2. 20bp Guide RNA Sequences Used in CRISPR/Cas9 Genome**  
991 **Engineering.** List of 20bp sequences homologous to the mouse 129 genome designed into  
992 CRISPR/Cas9 sgRNAs. Targeted genomic location (mm9 coordinates), genome strand, and  
993 brief description of purpose for sgRNA is included.  
994

995 **Supplementary File 3. Data Table from 3D Tracking of cuO/CymR and tetO/TetR labels.** All  
996 data used in the study for cuO/CymR and tetO/TetR localization. C1 refers to Channel 1  
997 (cuO/CymR). C2 refers to Channel2 (tetO/TetR). Columns are as follows:  
998

999 **Cell\_Line** – label used to identify cell line  
1000 **Batch** – unique microscopy session identifier  
1001 **C1\_T\_Step-sec** – step size between frames  
1002 **Locus\_ID** – unique identifier for each Sox2 locus  
1003 **C1\_TrackID** – track identifier from TrackMate  
1004 **C1\_Track\_Length** – track length from TrackMate  
1005 **C1\_SpotID** – spot identifier from TrackMate  
1006 **C1\_X\_Value\_pixel** – X position in pixels for C1 spot  
1007 **C1\_Y\_Value\_pixel** – Y position in pixels for C1 spot  
1008 **C1\_Z\_Value\_slice** – Z position in slices for C1 spot  
1009 **C1\_T\_Value\_frame** – frame of measurement  
1010 **C1\_X\_Value\_um** – X position in microns for C1 spot  
1011 **C1\_Y\_Value\_um** – Y position in microns for C1 spot  
1012 **C1\_Z\_Value\_um** – Z position in microns for C1 spot  
1013 **C1\_T\_Value\_sec** – time point in seconds for measurement  
1014 **C2\_TrackID** – track identifier from TrackMate  
1015 **C2\_Track\_Length** – track length from TrackMate  
1016 **C2\_SpotID** – spot identifier from TrackMate  
1017 **C2\_X\_Value\_pixel** – X position in pixels for C2 spot  
1018 **C2\_Y\_Value\_pixel** – Y position in pixels for C2 spot  
1019 **C2\_Z\_Value\_slice** – Z position in slices for C2 spot  
1020 **C2\_T\_Value\_frame** – imaging frame  
1021 **C2\_X\_Value\_um** – X position in microns for C2 spot  
1022 **C2\_Y\_Value\_um** – Y position in microns for C2 spot  
1023 **C2\_Z\_Value\_um** – Z position in microns for C2 spot  
1024 **C2\_T\_Value\_sec** – time point in seconds  
1025 **X\_Distance\_um** – X distance between C1 and C2 labels  
1026 **Y\_Distance\_um** – Y distance between C1 and C2 labels  
1027 **Z\_Distance\_um** – Z distance between C1 and C2 labels  
1028 **XY\_Distance\_um** – XY distance between C1 and C2 labels  
1029 **XYZ\_Distance\_um** – XYZ distance between C1 and C2 labels,



1030 **C1\_Corrected\_X\_Value\_um** – X position in microns for C1 spot after correcting for  
1031 chromatic aberration,  
1032 **C1\_Corrected\_Y\_Value\_um** – Y position in microns for C1 spot after correcting for  
1033 chromatic aberration  
1034 **C1\_Corrected\_Z\_Value\_um** – Z position in microns for C1 spot after correcting for  
1035 chromatic aberration  
1036 **Corrected\_X\_Distance\_um** – X distance after correcting for chromatic aberration  
1037 **Corrected\_Y\_Distance\_um** – Y distance after correcting for chromatic aberration  
1038 **Corrected\_Z\_Distance\_um** – Z distance after correcting for chromatic aberration  
1039 **Corrected\_XY\_Distance\_um** – XY distance after correcting for chromatic aberration  
1040 **Corrected\_XYZ\_Distance\_um** – XYZ distance after correcting for chromatic aberration  
1041 **Relative\_C1\_Corrected\_X\_Value\_um** – X position of C1 label relative to the position of  
1042 C2 in microns  
1043 **Relative\_C1\_Corrected\_Y\_Value\_um** – Y position of C1 label relative to the position of  
1044 C2 in microns  
1045 **Relative\_C1\_Corrected\_Z\_Value\_um** – Z position of C1 label relative to the position of  
1046 C2 in microns  
1047 **Relative\_XY\_Displacement\_um** – Relative XY distance traveled by the C1 label  
1048 between adjacent frames  
1049 **Relative\_XYZ\_Displacement\_um** – Relative XYZ distance traveled by the C1 label  
1050 between adjacent frames  
1051 **Relative\_XY\_Angle\_radians** – Relative angle between two successive displacements  
1052 for the C1 label in the XY plane  
1053  
1054

1055 **Supplementary File 4. Data Table for MS2 Transcription Analysis for All Loci.** All data used  
1056 in transcriptional analysis of Sox2 locus. Columns are as follows:

1057 **Cell\_Line** – label used to identify cell line  
1058 **Locus\_ID** – unique identifier for each Sox2 locus  
1059 **Gauss\_Filter** – whether the MS2 Gaussian fit passed the knn filter step  
1060 **Noise\_Filter** – whether the MS2 Gaussian fit passed a high frequency noise filter step  
1061 **Pass\_Filter** – whether the MS2 signal for the given frame was classified as  
1062 transcriptional signal. Required both Gauss\_Filter = TRUE and Noise\_Filter = TRUE  
1063 **Gaussian\_Height\_Threshold** – minimum relative height above background allowed for  
1064 Gaussian fit  
1065 **Gaussian\_Width\_Threshold** – maximum Gaussian variance allowed for Gaussian fit  
1066 **Background** – Offset calculated from Gaussian fit. If no Gaussian fit was found, set to  
1067 median pixel intensity of ROI  
1068 **Gaussian Height** – Amplitude calculated from Gaussian fit. If no Gaussian fit was found,  
1069 set to 0  
1070 **Gaussian\_Volume** – Volume under fitted Gaussian. If no Gaussian fit was found, set to  
1071 0  
1072 **Local\_Median** – Median pixel intensity of ROI  
1073 **Norm\_MS2\_Signal** – Relative height of MS2 gaussian normalized to background. For  
1074 frames that did not pass filter, local median value was used in place of gaussian height.  
1075 See MATERIALS and METHODS for more details.  
1076 **R\_Squared** – Coefficient of determination between 2D gaussian fit and experimental  
1077 data  
1078 **T\_Value\_frame** – imaging frame  
1079 **X\_Value\_pixel** – X position in pixels for C2 spot (cuO/CymR)  
1080 **X\_Location** – X position of peak of fit Gaussian  
1081 **X\_Sigma** – X dimension variance of fit Gaussian  
1082 **Y\_Value\_pixel** – Y position in pixels for C2 spot (cuO/CymR)  
1083 **Y\_Location** – Y position of peak of fit Gaussian  
1084 **Y\_Sigma** – Y dimension variance of fit Gaussian

1085 **Z\_Value\_slice** – Z position in slices for C2 spot (cuO/CymR)

1086 **Batch** – unique microscopy session identifier

1087

1088 **Supplementary File 5. Data Table for MS2 Transcription Analysis and 3D Localization for Sox2-SCR Singlets.** Data used to compare transcriptional activity of Sox2 locus to 3D distances between Sox2 and SCR. C1 refers to Channel 1 (tetO/TetR). C2 refers to Channel2 (cuO/CymR). Columns are as in Supplementary Files 3 and 4 with one additional column:

1091 **Active\_Transcribing** – Whether the locus demonstrated any MS2 signal that passed filter during imaging session.

1092

1093 **Supplementary File 6. Data Table of Statistical Comparison of Distances Centered on Transcriptional Bursts.** Summary statistics and associated Mann-Whitney p-values for pairwise comparisons between burst centered and random centered distances.

1094

1095

## 1096 **SUPPLEMENTAL VIDEO LEGENDS**

1101 **Video 1. Visualization of Sister Chromatids at Sox2 Locus.** Maximum-intensity Z projection of 3D confocal Z-stacks of cuO/CymR-GFP (left) and tetO/TetR-tdTom (middle) labeling the Sox2 promoter region and SCR, respectively demonstrate two clear spots for the SCR label, suggesting cells in S/G2. These cells were excluded from analysis. Scale bar is 1  $\mu$ m.

1102

1103 **Video 2. Variability in Sox2 Locus Organization Across Cells.** Maximum-intensity Z projection of 3D confocal Z-stacks of cuO/CymR (green) and tetO/TetR (magenta) labeling the Sox2 promoter region and SCR, respectively for three individual cells highlighted in Figure 3. The distance range explored by Cell1 and Cell2 is limited, while Cell3 shows large, abrupt changes in distance. Scale bar is 1  $\mu$ m.

1104

1105 **Video 3. Identification of Sox2 Transcriptional Bursts in mESCs.** Maximum-intensity Z projection of 3D confocal Z-stacks of a tandem dimer of MS2 coat protein fused with two copies of tagRFP-T. The dashed yellow box highlights the ROI used for burst detection in our automated analysis pipeline, centered on the location of the Sox2 promoter (cuO/CymR location, not shown). Detected bursts are highlighted by red circles centered on the burst location, with color intensity indicating burst intensity. Scale bar is 1  $\mu$ m.

1106

1107 **Video 4. High Transcriptional Output from Sox2 Locus.** Maximum-intensity Z projection of 3D confocal Z-stacks of a tandem dimer of MS2 coat protein fused with two copies of tagRFP-T demonstrate a period of high transcriptional activity for the highlighted Sox2 gene. The dashed yellow box highlights the ROI used for burst detection in our automated analysis pipeline, centered on the location of the Sox2 promoter (cuO/CymR location, not shown). Detected bursts are highlighted by red circles centered on the burst location, with color intensity indicating burst intensity. Scale bar is 1  $\mu$ m.

1108

1109 **Video 5. Sox2 Transcriptional Bursts in the Absence of SCR Proximity.** Maximum-intensity Z projection of 3D confocal Z-stacks of cuO/CymR (green) and tetO/TetR (magenta) labeling the Sox2 promoter region and SCR, respectively (left), and MS2 coat protein highlighting Sox2 transcriptional activity (right). We detect clear Sox2 transcriptional bursts despite no colocalization of the Sox2/SCR labels. Scale bar is 1  $\mu$ m.

1110

1111

1112

1113

1114

1115

1116

1117

1118

1119

1120

1121

1122

1123

1134 **ACKNOWLEDGMENTS**

1135 We thank Elphege Nora, Geoffrey Fudenberg, Brian Black, and members of the Lomvardas and  
1136 Weiner labs for helpful discussion; Elphege Nora, Benoit Bruneau, and Kirstin Meyer for a  
1137 critical reading of the manuscript; Lena Bengtsson for experimental help and technical  
1138 assistance; and Edith Heard, Patrick Devine, Feng Zhang, Elphege Nora, Michele Calos, Robert  
1139 Singer, Philippe Soriano, Barbara Panning, Ali Brivanlou and Luke Lavis for helpful reagents.  
1140 This work was supported by an American Heart Association Postdoctoral Fellowship  
1141 (#16POST309100006, JMA); NIH Grants R21EB022787 (ODW), R35GM118167 (ODW),  
1142 R01DC013560 (SL), and R21EB021453 (BH); and the WM Keck Foundation Medical Research  
1143 Grant (BH). BH is a Chan Zuckerberg Biohub Investigator.

1144 **COMPETING INTERESTS**

1145 The authors declare no competing interests.

1146 **REFERENCES**

- 1147
- 1148
- 1149
- 1150 Afgan, E., Baker, D., Batut, B., van den Beek, M., Bouvier, D., Čech, M., Chilton, J., Clements,  
1151 D., Coraor, N., Grüning, B.A., et al. (2018). The Galaxy platform for accessible, reproducible  
1152 and collaborative biomedical analyses: 2018 update. *Nucleic Acids Research* 46, W537–W544.
- 1153 Alberts, B., Johnson, A.D., Lewis, J., Morgan, D., Raff, M., Roberts, K., and Walter, P. (2014).  
1154 *Molecular Biology of the Cell* (W. W. Norton & Company).
- 1155 Banerji, J., Olson, L., and Schaffner, W. (1983). A lymphocyte-specific cellular enhancer is  
1156 located downstream of the joining region in immunoglobulin heavy chain genes. *Cell* 33, 729–  
1157 740.
- 1158 Bartman, C.R., Hsu, S.C., Hsiung, C.C.-S., Raj, A., and Blobel, G.A. (2016). Enhancer  
1159 Regulation of Transcriptional Bursting Parameters Revealed by Forced Chromatin Looping. *Mol*  
1160 *Cell* 62, 237–247.
- 1161 Beagan, J.A., Duong, M.T., Titus, K.R., Zhou, L., Cao, Z., Ma, J., Lachanski, C.V., Gillis, D.R.,  
1162 and Phillips-Cremins, J.E. (2017). YY1 and CTCF orchestrate a 3D chromatin looping switch  
1163 during early neural lineage commitment. *Genome Research* 27, 1139–1152.
- 1164 Belmont, A.S., and Straight, A.F. (1998). In vivo visualization of chromosomes using lac  
1165 operator-repressor binding. *Trends Cell Biol* 8, 121–124.
- 1166 Benabdallah, N.S., Williamson, I., Illingworth, R.S., Boyle, S., Grimes, G.R., Therizols, P., and  
1167 Bickmore, W.A. (2017). PARP mediated chromatin unfolding is coupled to long-range enhancer  
1168 activation. *Biorxiv.org*
- 1169 Bertrand, E., Chartrand, P., Schaefer, M., Shenoy, S.M., Singer, R.H., and Long, R.M. (1998).  
1170 Localization of ASH1 mRNA particles in living yeast. *Mol Cell* 2, 437–445.
- 1171 Bickmore, W.A. (2013). The Spatial Organization of the Human Genome. *Annu. Rev. Genom.*  
1172 *Hum. Genet.* 14, 67–84.
- 1173 Blum, R., Vethanatham, V., Bowman, C., Rudnicki, M., and Dynlacht, B.D. (2012). Genome-wide  
1174 identification of enhancers in skeletal muscle: the role of MyoD1. *Genes Dev* 26, 2763–2779.
- 1175 Bonev, B., Mendelson Cohen, N., Szabo, Q., Fritsch, L., Papadopoulos, G.L., Lubling, Y., Xu,  
1176 X., Lv, X., Hugnot, J.-P., Tanay, A., et al. (2017). Multiscale 3D Genome Rewiring during Mouse  
1177 Neural Development. *Cell* 171, 557–572.e24.

- 1178 Bothma, J.P., Garcia, H.G., Esposito, E., Schlissel, G., Gregor, T., and Levine, M. (2014).  
1179 Dynamic regulation of eve stripe 2 expression reveals transcriptional bursts in living *Drosophila*  
1180 embryos. *Proc Natl Acad Sci U S A* *111*, 10598–10603.
- 1181 Boyle, A., Davis, S., Shulha, H., Meltzer, P., Margulies, E., Weng, Z., Furey, T., and Crawford,  
1182 G.E. (2008). High-Resolution Mapping and Characterization of Open Chromatin across the  
1183 Genome. *Cell* *132*, 311–322.
- 1184 Buecker, C., Srinivasan, R., Wu, Z., Calo, E., Acampora, D., Faial, T., Simeone, A., Tan, M.,  
1185 Swigut, T., and Wysocka, J. (2014). Reorganization of Enhancer Patterns in Transition from  
1186 Naive to Primed Pluripotency. *Stem Cell* *14*, 838–853.
- 1187 Buenrostro, J.D., Giresi, P.G., Zaba, L.C., Chang, H.Y., and Greenleaf, W.J. (2013).  
1188 Transposition of native chromatin for fast and sensitive epigenomic profiling of open chromatin,  
1189 DNA-binding proteins and nucleosome position. *Nature Methods* *10*, 1213–1218.
- 1190 Bulger, M., and Groudine, M. (2010). Enhancers: the abundance and function of regulatory  
1191 sequences beyond promoters. *Dev Biol* *339*, 250–257.
- 1192 Carlton, P.M., Boulanger, J., Kervrann, C., Sibarita, J.-B., Salamero, J., Gordon-Messer, S.,  
1193 Bressan, D., Haber, J.E., Haase, S., Shao, L., et al. (2010). Fast live simultaneous  
1194 multiwavelength four-dimensional optical microscopy. *Proc Natl Acad Sci U S A* *107*, 16016–  
1195 16022.
- 1196 Chen, B., Gilbert, L.A., Cimini, B.A., Schnitzbauer, J., Zhang, W., Li, G.-W., Park, J., Blackburn,  
1197 E.H., Weissman, J.S., Qi, L.S., et al. (2013). Dynamic Imaging of Genomic Loci in Living Human  
1198 Cells by an Optimized CRISPR/Cas System. *Cell* *155*, 1479–1491.
- 1199 Chen, H., Levo, M., Barinov, L., Fujioka, M., Jaynes, J.B., and Gregor, T. (2018). Dynamic  
1200 interplay between enhancer–promoter topology and gene activity. *Nature Genetics* *290*, 1–13.
- 1201 Chen, X., Vega, V.B., and Ng, H.H. (2008a). Transcriptional regulatory networks in embryonic  
1202 stem cells. *Cold Spring Harb Symp Quant Biol* *73*, 203–209.
- 1203 Chen, X., Xu, H., Yuan, P., Fang, F., Huss, M., Vega, V.B., Wong, E., Orlov, Y.L., Zhang, W.,  
1204 Jiang, J., et al. (2008b). Integration of external signaling pathways with the core transcriptional  
1205 network in embryonic stem cells. *Cell* *133*, 1106–1117.
- 1206 Cho, W.-K., Spille, J.-H., Hecht, M., Lee, C., Li, C., Grube, V., and Cisse, I.I. (2018). Mediator  
1207 and RNA polymerase II clusters associate in transcription-dependent condensates. *Science*  
1208 *361*, 412–415.
- 1209 Chubb, J.R., Trcek, T., Shenoy, S.M., and Singer, R.H. (2006). Transcriptional pulsing of a  
1210 developmental gene. *Curr Biol* *16*, 1018–1025.
- 1211 Cremer, T., Cremer, M., Dietzel, S., Müller, S., Solovei, I., and Fakan, S. (2006). Chromosome  
1212 territories – a functional nuclear landscape. *Current Opinion in Cell Biology* *18*, 307–316.
- 1213 Creighton, M.P., Cheng, A.W., Welstead, G.G., Kooistra, T., Carey, B.W., Steine, E.J., Hanna,  
1214 J., Lodato, M.A., Frampton, G.M., Sharp, P.A., et al. (2010). Histone H3K27ac separates active  
1215 from poised enhancers and predicts developmental state. *Proc Natl Acad Sci USA* *107*, 21931–  
1216 21936.
- 1217 de Wit, E., Vos, E.S.M., Holwerda, S.J.B., Valdes-Quezada, C., Verstegen, M.J.A.M.,  
1218 Teunissen, H., Splinter, E., Wijchers, P.J., Krijger, P.H.L., and de Laat, W. (2015). CTCF  
1219 Binding Polarity Determines Chromatin Looping. *Mol Cell* *60*, 676–684.

- 1220 Dekker, J. (2016). Mapping the 3D genome: Aiming for consilience. *Nat Rev Mol Cell Biol* 17,  
1221 741–742.
- 1222 Dekker, J., and Mirny, L. (2016). The 3D Genome as Moderator of Chromosomal  
1223 Communication. *Cell* 164, 1110–1121.
- 1224 Deng, W., Lee, J., Wang, H., Miller, J., Reik, A., Gregory, P.D., Dean, A., and Blobel, G.A.  
1225 (2012). Controlling Long-Range Genomic Interactions at a Native Locus by Targeted Tethering  
1226 of a Looping Factor. *Cell* 149, 1233–1244.
- 1227 Deng, W., Rupon, J.W., Krivega, I., Breda, L., Motta, I., Jahn, K.S., Reik, A., Gregory, P.D.,  
1228 Rivella, S., Dean, A., et al. (2014). Reactivation of developmentally silenced globin genes by  
1229 forced chromatin looping. *Cell* 158, 849–860.
- 1230 Dixon, J.R., Selvaraj, S., Yue, F., Kim, A., Li, Y., Shen, Y., Hu, M., Liu, J.S., and Ren, B. (2012).  
1231 Topological domains in mammalian genomes identified by analysis of chromatin interactions.  
1232 *Nature* 485, 376–380.
- 1233 Downen, J.M., Fan, Z.P., Hnisz, D., Ren, G., Abraham, B.J., Zhang, L.N., Weintraub, A.S.,  
1234 Schuijers, J., Lee, T.I., Zhao, K., et al. (2014). Control of Cell Identity Genes Occurs in Insulated  
1235 Neighborhoods in Mammalian Chromosomes. *Cell* 159, 374–387.
- 1236 Durand, N.C., Robinson, J.T., Shamim, M.S., Machol, I., Mesirov, J.P., Lander, E.S., and Aiden,  
1237 E.L. (2016). Juicebox Provides a Visualization System for Hi-C Contact Maps with Unlimited  
1238 Zoom. *Cell Systems* 3, 99–101.
- 1239 Edelstein, A., Amodaj, N., Hoover, K., Vale, R., and Stuurman, N. (2010). Computer Control of  
1240 Microscopes Using  $\mu$ Manager. *Curr Protoc Mol Biol* 92, 14.20.1–14.20.17.
- 1241 Fudenberg, G., and Imakaev, M. (2017). FISH-ing for captured contacts: towards reconciling  
1242 FISH and 3C. *Nature Methods* 14, 1–7.
- 1243 Fukaya, T., Lim, B., and Levine, M. (2016). Enhancer Control of Transcriptional Bursting. *Cell*  
1244 166, 358–368.
- 1245 Germier, T., Kocanova, S., Walther, N., Bancaud, A., Shaban, H.A., Sellou, H., Politi, A.Z.,  
1246 Ellenberg, J., Gallardo, F., and Bystricky, K. (2017). Real-Time Imaging of a Single Gene  
1247 Reveals Transcription-Initiated Local Confinement. *Biophys J* 113, 1383–1394.
- 1248 Giorgetti, L., and Heard, E. (2016). Closing the loop: 3C versus DNA FISH. *Genome Biol* 17, 1–  
1249 9.
- 1250 Grimm, J.B., English, B.P., Chen, J., Slaughter, J.P., Zhang, Z., Revyakin, A., Patel, R.,  
1251 Macklin, J.J., Normanno, D., Singer, R.H., et al. (2015). A general method to improve  
1252 fluorophores for live-cell and single-molecule microscopy. *Nature Methods* 12, 244–250.
- 1253 Gröschel, S., Sanders, M.A., Hoogenboezem, R., de Wit, E., Bouwman, B.A.M., Erpelinck, C.,  
1254 van der Velden, V.H.J., Havermans, M., Avellino, R., van Lom, K., et al. (2014). A Single  
1255 Oncogenic Enhancer Rearrangement Causes Concomitant EVI1 and GATA2 Deregulation in  
1256 Leukemia. *Cell* 157, 369–381.
- 1257 Gu, B., Swigut, T., Spencley, A., Bauer, M.R., Chung, M., Meyer, T., and Wysocka, J. (2018).  
1258 Transcription-coupled changes in nuclear mobility of mammalian cis-regulatory elements.  
1259 *Science* 359, 1050–1055.

- 1260 Guo, Y., Xu, Q., Canzio, D., Shou, J., Li, J., Gorkin, D.U., Jung, I., Wu, H., Zhai, Y., Tang, Y., et  
1261 al. (2015). CRISPR Inversion of CTCF Sites Alters Genome Topology and Enhancer/Promoter  
1262 Function. *Cell* 162, 900–910.
- 1263 Heintzman, N.D., Hon, G.C., Hawkins, R.D., Kheradpour, P., Stark, A., Harp, L.F., Ye, Z., Lee,  
1264 L.K., Stuart, R.K., Ching, C.W., et al. (2009). Histone modifications at human enhancers reflect  
1265 global cell-type-specific gene expression. *Nature* 459, 108–112.
- 1266 Heintzman, N.D., Stuart, R.K., Hon, G., Fu, Y., Ching, C.W., Hawkins, R.D., Barrera, L.O., Van  
1267 Calcar, S., Qu, C., Ching, K.A., et al. (2007). Distinct and predictive chromatin signatures of  
1268 transcriptional promoters and enhancers in the human genome. *Nat Genet* 39, 311–318.
- 1269 Hnisz, D., Shrinivas, K., Young, R.A., Chakraborty, A.K., and Sharp, P.A. (2017). A Phase  
1270 Separation Model for Transcriptional Control. *Cell* 169, 13–23.
- 1271 Horta, A., Monahan, K., Bashkirova, L., and Lomvardas, S. (2018). Cell type-specific  
1272 interchromosomal interactions as a mechanism for transcriptional diversity. *bioRxiv* 287532.
- 1273 Huang, J., Liu, X., Li, D., Shao, Z., Cao, H., Zhang, Y., Trompouki, E., Bowman, T.V., Zon, L.I.,  
1274 Yuan, G.-C., et al. (2016). Dynamic Control of Enhancer Repertoires Drives Lineage and Stage-  
1275 Specific Transcription during Hematopoiesis. *Developmental Cell* 36, 9–23.
- 1276 Jin, F., Li, Y., Dixon, J.R., Selvaraj, S., Ye, Z., Lee, A.Y., Yen, C.-A., Schmitt, A.D., Espinoza,  
1277 C.A., and Ren, B. (2013). A high-resolution map of the three-dimensional chromatin interactome  
1278 in human cells. *Nature* 503, 290–294.
- 1279 Kamachi, Y., and Kondoh, H. (2013). Sox proteins: regulators of cell fate specification and  
1280 differentiation. *Development* 140, 4129–4144.
- 1281 Kent, W.J., Sugnet, C.W., Furey, T.S., Roskin, K.M., Pringle, T.H., Zahler, A.M., and Haussler,  
1282 D. (2002). The human genome browser at UCSC. *Genome Research* 12, 996–1006.
- 1283 Kervrann, C., and Boulanger, J. (2006). Optimal spatial adaptation for patch-based image  
1284 denoising. *IEEE Trans Image Process* 15, 2866–2878.
- 1285 Kieffer-Kwon, K.-R., Tang, Z., Mathe, E., Qian, J., Sung, M.-H., Li, G., Resch, W., Baek, S.,  
1286 Pruett, N., Grøntved, L., et al. (2013). Interactome Maps of Mouse Gene Regulatory Domains  
1287 Reveal Basic Principles of Transcriptional Regulation. *Cell* 155, 1507–1520.
- 1288 Kim, T.-K., Hemberg, M., and Gray, J.M. (2015). Enhancer RNAs: A Class of Long Noncoding  
1289 RNAs Synthesized at Enhancers: Figure 1. *Cold Spring Harb Perspect Biol* 7, a018622–  
1290 a018623.
- 1291 Krijger, P.H.L., and de Laat, W. (2016). Regulation of disease-associated gene expression in  
1292 the 3D genome. *Nat Rev Mol Cell Biol* 17, 771–782.
- 1293 Lacoste, A., Berenshteyn, F., and Brivanlou, A.H. (2009). An efficient and reversible  
1294 transposable system for gene delivery and lineage-specific differentiation in human embryonic  
1295 stem cells. *Cell Stem Cell* 5, 332–342.
- 1296 Langmead, B., Trapnell, C., Pop, M., and Salzberg, S.L. (2009). Ultrafast and memory-efficient  
1297 alignment of short DNA sequences to the human genome. *Genome Biol* 10, R25.
- 1298 Lefebvre, V., Dumitriu, B., Penzo-Méndez, A., Han, Y., and Pallavi, B. (2007). Control of cell  
1299 fate and differentiation by Sry-related high-mobility-group box (Sox) transcription factors. *Int J*  
1300 *Biochem Cell Biol* 39, 2195–2214.

- 1301 Li, G., Ruan, X., Auerbach, R.K., Sandhu, K.S., Zheng, M., Wang, P., Poh, H.M., Goh, Y., Lim,  
1302 J., Zhang, J., et al. (2012). Extensive Promoter-Centered Chromatin Interactions Provide a  
1303 Topological Basis for Transcription Regulation. *Cell* 148, 84–98.
- 1304 Li, Y., Rivera, C.M., Ishii, H., Jin, F., Selvaraj, S., Lee, A.Y., Dixon, J.R., and Ren, B. (2014).  
1305 CRISPR Reveals a Distal Super-Enhancer Required for Sox2 Expression in Mouse Embryonic  
1306 Stem Cells. *PLoS ONE* 9, e114485.
- 1307 Lieberman-Aiden, E., Van Berkum, N.L., Williams, L., Imakaev, M., Ragooczy, T., Telling, A.,  
1308 Amit, I., Lajoie, B.R., Sabo, P.J., Dorschner, M.O., et al. (2009). Comprehensive mapping of  
1309 long-range interactions reveals folding principles of the human genome. *Science* 326, 289–293.
- 1310 Lim, B., Heist, T., Levine, M., and Fukaya, T. (2018). Visualization of Transvection in Living  
1311 *Drosophila* Embryos. *Mol Cell* 70, 287–296.e6.
- 1312 Lionnet, T., Czaplinski, K., Darzacq, X., Shav-Tal, Y., Wells, A.L., Chao, J.A., Park, H.Y., de  
1313 Turrís, V., Lopez-Jones, M., and Singer, R.H. (2011). A transgenic mouse for in vivo detection of  
1314 endogenous labeled mRNA. *Nature Methods* 8, 165–170.
- 1315 Long, H.K., Prescott, S.L., and Wysocka, J. (2016). Ever-Changing Landscapes: Transcriptional  
1316 Enhancers in Development and Evolution. *Cell* 167, 1170–1187.
- 1317 Lovén, J., Hoke, H.A., Lin, C.Y., Lau, A., Orlando, D.A., Vakoc, C.R., Bradner, J.E., Lee, T.I.,  
1318 and Young, R.A. (2013). Selective Inhibition of Tumor Oncogenes by Disruption of Super-  
1319 Enhancers. *Cell* 153, 320–334.
- 1320 Lucas, J.S., Zhang, Y., Dudko, O.K., and Murre, C. (2014). 3D trajectories adopted by coding  
1321 and regulatory DNA elements: first-passage times for genomic interactions. *Cell* 158, 339–352.
- 1322 Lupiáñez, D.G., Kraft, K., Heinrich, V., Krawitz, P., Brancati, F., Klopocki, E., Horn, D., Kayserili,  
1323 H., Opitz, J.M., Laxova, R., et al. (2015). Disruptions of topological chromatin domains cause  
1324 pathogenic rewiring of gene-enhancer interactions. *Cell* 161, 1012–1025.
- 1325 Markenscoff-Papadimitriou, E., Allen, W.E., Colquitt, B.M., Goh, T., Murphy, K.K., Monahan, K.,  
1326 Mosley, C.P., Ahituv, N., and Lomvardas, S. (2014). Enhancer interaction networks as a means  
1327 for singular olfactory receptor expression. *Cell* 159, 543–557.
- 1328 Marshall, W.F., Straight, A., Marko, J.F., Swedlow, J., Dernburg, A., Belmont, A., Murray, A.W.,  
1329 Agard, D.A., and Sedat, J.W. (1997). Interphase chromosomes undergo constrained diffusional  
1330 motion in living cells. *Curr Biol* 7, 930–939.
- 1331 Martin, R.M., Rino, J., Carvalho, C., Kirchhausen, T., and Carmo-Fonseca, M. (2013). Live-Cell  
1332 Visualization of Pre-mRNA Splicing with Single-Molecule Sensitivity. *CellReports* 4, 1144–1155.
- 1333 Masui, O., Bonnet, I., Le Baccon, P., Brito, I., Pollex, T., Murphy, N., Hupé, P., Barillot, E.,  
1334 Belmont, A.S., and Heard, E. (2011). Live-Cell Chromosome Dynamics and Outcome of X  
1335 Chromosome Pairing Events during ES Cell Differentiation. *Cell* 145, 447–458.
- 1336 Michaelis, C., Ciosk, R., and Nasmyth, K. (1997). Cohesins: chromosomal proteins that prevent  
1337 premature separation of sister chromatids. *Cell* 91, 35–45.
- 1338 Morgan, S.L., Mariano, N.C., Bermudez, A., Arruda, N.L., Wu, F., Luo, Y., Shankar, G., Jia, L.,  
1339 Chen, H., Hu, J.-F., et al. (2017). Manipulation of nuclear architecture through CRISPR-  
1340 mediated chromosomal looping. *Nat Commun* 8, 1–9.

- 1341 Mullick, A., Xu, Y., Warren, R., Koutroumanis, M., Guilbault, C., Broussau, S., Malenfant, F.,  
1342 Bourget, L., Lamoureux, L., Lo, R., et al. (2006). The cumate gene-switch: a system for  
1343 regulated expression in mammalian cells. *BMC Biotechnol* 6, 43.
- 1344 Mumbach, M.R., Rubin, A.J., Flynn, R.A., Dai, C., Khavari, P.A., Greenleaf, W.J., and Chang,  
1345 H.Y. (2016). HiChIP: efficient and sensitive analysis of protein-directed genome architecture.  
1346 *Nature Methods* 13, 919–922.
- 1347 Narendra, V., Rocha, P.P., An, D., Raviram, R., Skok, J.A., Mazzoni, E.O., and Reinberg, D.  
1348 (2015). CTCF establishes discrete functional chromatin domains at the Hox clusters during  
1349 differentiation. *Science* 347, 1017–1021.
- 1350 Nora, E.P., Goloborodko, A., Valton, A.-L., Gibcus, J.H., Uebersohn, A., Abdennur, N., Dekker,  
1351 J., Mirny, L.A., and Bruneau, B.G. (2017). Targeted Degradation of CTCF Decouples Local  
1352 Insulation of Chromosome Domains from Genomic Compartmentalization. *Cell* 169, 930–  
1353 933.e22.
- 1354 Nora, E.P., Lajoie, B.R., Schulz, E.G., Giorgetti, L., Okamoto, I., Servant, N., Piolot, T., Van  
1355 Berkum, N.L., Meisig, J., Sedat, J., et al. (2012). Spatial partitioning of the regulatory landscape  
1356 of the X-inactivation centre. *Nature* 485, 381–385.
- 1357 Ochiai, H., Sugawara, T., Sakuma, T., and Yamamoto, T. (2014). Stochastic promoter activation  
1358 affects Nanog expression variability in mouse embryonic stem cells. *Sci. Rep.* 4, 7125.
- 1359 Okamoto, R., Uchikawa, M., and Kondoh, H. (2014). Sixteen additional enhancers associated  
1360 with the chicken Sox2 locus outside the central 50-kb region. *Dev Growth Differ* 57, 24–39.
- 1361 Pevny, L.H., and Nicolis, S.K. (2010). Sox2 roles in neural stem cells. *Int J Biochem Cell Biol*  
1362 42, 421–424.
- 1363 Phillips-Cremins, J.E., Sauria, M.E.G., Sanyal, A., Gerasimova, T.I., Lajoie, B.R., Bell, J.S.K.,  
1364 Ong, C.-T., Hookway, T.A., Guo, C., Sun, Y., et al. (2013). Architectural Protein Subclasses  
1365 Shape 3D Organization of Genomes during Lineage Commitment. *Cell* 153, 1281–1295.
- 1366 Quinodoz, S.A., Ollikainen, N., Tabak, B., Palla, A., Schmidt, J.M., Detmar, E., Lai, M.M.,  
1367 Shishkin, A.A., Bhat, P., Takei, Y., et al. (2018). Higher-Order Inter-chromosomal Hubs Shape  
1368 3D Genome Organization in the Nucleus. *Cell* 174, 744–757.e24.
- 1369 Rada-Iglesias, A., Bajpai, R., Swigut, T., Brugmann, S.A., Flynn, R.A., and Wysocka, J. (2010).  
1370 A unique chromatin signature uncovers early developmental enhancers in humans. *Nature* 470,  
1371 –283.
- 1372 Rao, S.S.P., Huang, S.-C., Hilaire, B.G.S., Engreitz, J.M., Perez, E.M., Kieffer-Kwon, K.-R.,  
1373 Sanborn, A.L., Johnstone, S.E., Bascom, G.D., Bochkov, I.D., et al. (2017). Cohesin Loss  
1374 Eliminates All Loop Domains. *Cell* 171, 305–309.e324.
- 1375 Rao, S.S.P., Huntley, M.H., Durand, N.C., Stamenova, E.K., Bochkov, I.D., Robinson, J.T.,  
1376 Sanborn, A.L., Machol, I., Omer, A.D., Lander, E.S., et al. (2014). A 3D Map of the Human  
1377 Genome at Kilobase Resolution Reveals Principles of Chromatin Looping. *Cell* 159, 1665–1680.
- 1378 Raymond, C.S., and Soriano, P. (2007). High-efficiency FLP and PhiC31 site-specific  
1379 recombination in mammalian cells. *PLoS ONE* 2, e162.
- 1380 Robinett, C.C., Straight, A., Li, G., Wilhelm, C., Sudlow, G., Murray, A., and Belmont, A.S.  
1381 (1996). In vivo localization of DNA sequences and visualization of large-scale chromatin  
1382 organization using lac operator/repressor recognition. *J Cell Biol* 135, 1685–1700.



- 1383 Roukos, V., Voss, T.C., Schmidt, C.K., Lee, S., Wangsa, D., and Misteli, T. (2013). Spatial  
1384 Dynamics of Chromosome Translocations in Living Cells. *Science* 341, 660–664.
- 1385 Sabari, B.R., Dall'Agnesse, A., Boija, A., Klein, I.A., Coffey, E.L., Shrinivas, K., Abraham, B.J.,  
1386 Hannett, N.M., Zamudio, A.V., Manteiga, J.C., et al. (2018). Coactivator condensation at super-  
1387 enhancers links phase separation and gene control. *Science* 361, eaar3958.
- 1388 Sanyal, A., Lajoie, B.R., Jain, G., and Dekker, J. (2012). The long-range interaction landscape  
1389 of gene promoters. *Nature* 489, 109–113.
- 1390 Sarkar, A., and Hochedlinger, K. (2013). The Sox Family of Transcription Factors: Versatile  
1391 Regulators of Stem and Progenitor Cell Fate. *Stem Cell* 12, 15–30.
- 1392 Schindelin, J., Arganda-Carreras, I., Frise, E., Kaynig, V., Longair, M., Pietzsch, T., Preibisch,  
1393 S., Rueden, C., Saalfeld, S., Schmid, B., et al. (2012). Fiji: an open-source platform for  
1394 biological-image analysis. *Nature Methods* 9, 676–682.
- 1395 Schneider, C.A., Rasband, W.S., and Eliceiri, K.W. (2012). NIH Image to ImageJ: 25 years of  
1396 image analysis. *Nature Methods* 9, 671–675.
- 1397 Schwarzer, W., and Spitz, F. (2014). The architecture of gene expression: integrating dispersed  
1398 cis-regulatory modules into coherent regulatory domains. *Current Opinion in Genetics &*  
1399 *Development* 27, 74–82.
- 1400 Sexton, T., Yaffe, E., Kenigsberg, E., Bantignies, F., Leblanc, B., Hoichman, M., Parrinello, H.,  
1401 Tanay, A., and Cavalli, G. (2012). Three-Dimensional Folding and Functional Organization  
1402 Principles of the Drosophila Genome. *Cell* 148, 458–472.
- 1403 Sigal, A., Milo, R., Cohen, A., Geva-Zatorsky, N., Klein, Y., Liron, Y., Rosenfeld, N., Danon, T.,  
1404 Perzov, N., and Alon, U. (2006). Variability and memory of protein levels in human cells. *Nature*  
1405 444, 643–646.
- 1406 The ENCODE Project Consortium (2012). An integrated encyclopedia of DNA elements in the  
1407 human genome. *Nature* 488, 57–74.
- 1408 Thurman, R.E., Rynes, E., Humbert, R., Vierstra, J., Maurano, M.T., Haugen, E., Sheffield,  
1409 N.C., Stergachis, A.B., Wang, H., Vernot, B., et al. (2012). The accessible chromatin landscape  
1410 of the human genome. *Nature* 489, 75–82.
- 1411 Thyagarajan, B., Olivares, E.C., Hollis, R.P., Ginsburg, D.S., and Calos, M.P. (2001). Site-  
1412 specific genomic integration in mammalian cells mediated by phage phiC31 integrase.  
1413 *Molecular and Cellular Biology* 21, 3926–3934.
- 1414 Tinevez, J.-Y., Perry, N., Schindelin, J., Hoopes, G.M., Reynolds, G.D., Laplantine, E.,  
1415 Bednarek, S.Y., Shorte, S.L., and Eliceiri, K.W. (2017). TrackMate: An open and extensible  
1416 platform for single-particle tracking. *Methods* 115, 80–90.
- 1417 Tomioka, M., Nishimoto, M., Miyagi, S., Katayanagi, T., Fukui, N., Niwa, H., Muramatsu, M., and  
1418 Okuda, A. (2002). Identification of Sox-2 regulatory region which is under the control of Oct-3/4-  
1419 Sox-2 complex. *Nucleic Acids Research* 30, 3202–3213.
- 1420 Uchikawa, M., Ishida, Y., Takemoto, T., Kamachi, Y., and Kondoh, H. (2003). Functional  
1421 Analysis of Chicken Sox2 Enhancers Highlights an Array of Diverse Regulatory Elements that  
1422 Are Conserved in Mammals. *Dev Cell* 4, 509–519.

- 1423 Vierstra, J., Rynes, E., Sandstrom, R., Zhang, M., Canfield, T., Hansen, R.S., Stehling-Sun, S.,  
1424 Sabo, P.J., Byron, R., Humbert, R., et al. (2014). Mouse regulatory DNA landscapes reveal  
1425 global principles of cis-regulatory evolution. *Science* 346, 1007–1012.
- 1426 Wamstad, J.A., Alexander, J.M., Truty, R.M., Shrikumar, A., Li, F., Eilertson, K.E., Ding, H.,  
1427 Wylie, J.N., Pico, A.R., Capra, J.A., et al. (2012). Dynamic and Coordinated Epigenetic  
1428 Regulation of Developmental Transitions in the Cardiac Lineage. *Cell* 151, 1–29.
- 1429 Weina, K., and Utikal, J. (2014). SOX2 and cancer: current research and its implications in the  
1430 clinic. *Clin Transl Med* 3, 1–10.
- 1431 Weintraub, A.S., Li, C.H., Zamudio, A.V., Sigova, A.A., Hannett, N.M., Day, D.S., Abraham,  
1432 B.J., Cohen, M.A., Nabet, B., Buckley, D.L., et al. (2017). YY1 Is a Structural Regulator of  
1433 Enhancer-Promoter Loops. *Cell* 171, 1573–1588.e28.
- 1434 Whyte, W.A., Orlando, D.A., Hnisz, D., Abraham, B.J., Lin, C.Y., Kagey, M.H., Rahl, P.B., Lee,  
1435 T.I., and Young, R.A. (2013). Master Transcription Factors and Mediator Establish Super-  
1436 Enhancers at Key Cell Identity Genes. *Cell* 153, 307–319.
- 1437 Wuebben, E.L., and Rizzino, A. (2017). The dark side of SOX2: cancer - a comprehensive  
1438 overview. *Oncotarget* 8, 44917–44943.
- 1439 Xu, Z., Thomas, L., Davies, B., Chalmers, R., Smith, M., and Brown, W. (2013). Accuracy and  
1440 efficiency define Bxb1 integrase as the best of fifteen candidate serine recombinases for the  
1441 integration of DNA into the human genome. *BMC Biotechnol* 13, 87.
- 1442 Young, R.A. (2011). Control of the Embryonic Stem Cell State. *Cell* 144, 940–954.
- 1443 Zappone, M.V., Galli, R., Catena, R., Meani, N., De Biasi, S., Mattei, E., Tiveron, C., Vescovi,  
1444 A.L., Lovell-Badge, R., Ottolenghi, S., et al. (2000). Sox2 regulatory sequences direct  
1445 expression of a (beta)-geo transgene to telencephalic neural stem cells and precursors of the  
1446 mouse embryo, revealing regionalization of gene expression in CNS stem cells. *Development*  
1447 127, 2367–2382.
- 1448 Zhang, Y., Wong, C.-H., Birnbaum, R.Y., Li, G., Favaro, R., Ngan, C.Y., Lim, J., Tai, E., Poh,  
1449 H.M., Wong, E., et al. (2013). Chromatin connectivity maps reveal dynamic promoter-enhancer  
1450 long-range associations. *Nature* 504, 306–310.
- 1451 Zhou, H.Y., Katsman, Y., Dhaliwal, N.K., Davidson, S., Macpherson, N.N., Sakthidevi, M.,  
1452 Collura, F., and Mitchell, J.A. (2014). A Sox2 distal enhancer cluster regulates embryonic stem  
1453 cell differentiation potential. *Genes Dev* 28, 2699–2711.
- 1454 Zhu, J., Adli, M., Zou, J.Y., Verstappen, G., Coyne, M., Zhang, X., Durham, T., Miri, M.,  
1455 Deshpande, V., De Jager, P.L., et al. (2013). Genome-wide chromatin state transitions  
1456 associated with developmental and environmental cues. *Cell* 152, 642–654.
- 1457  
1458

## Figure 1--figure supplement 1

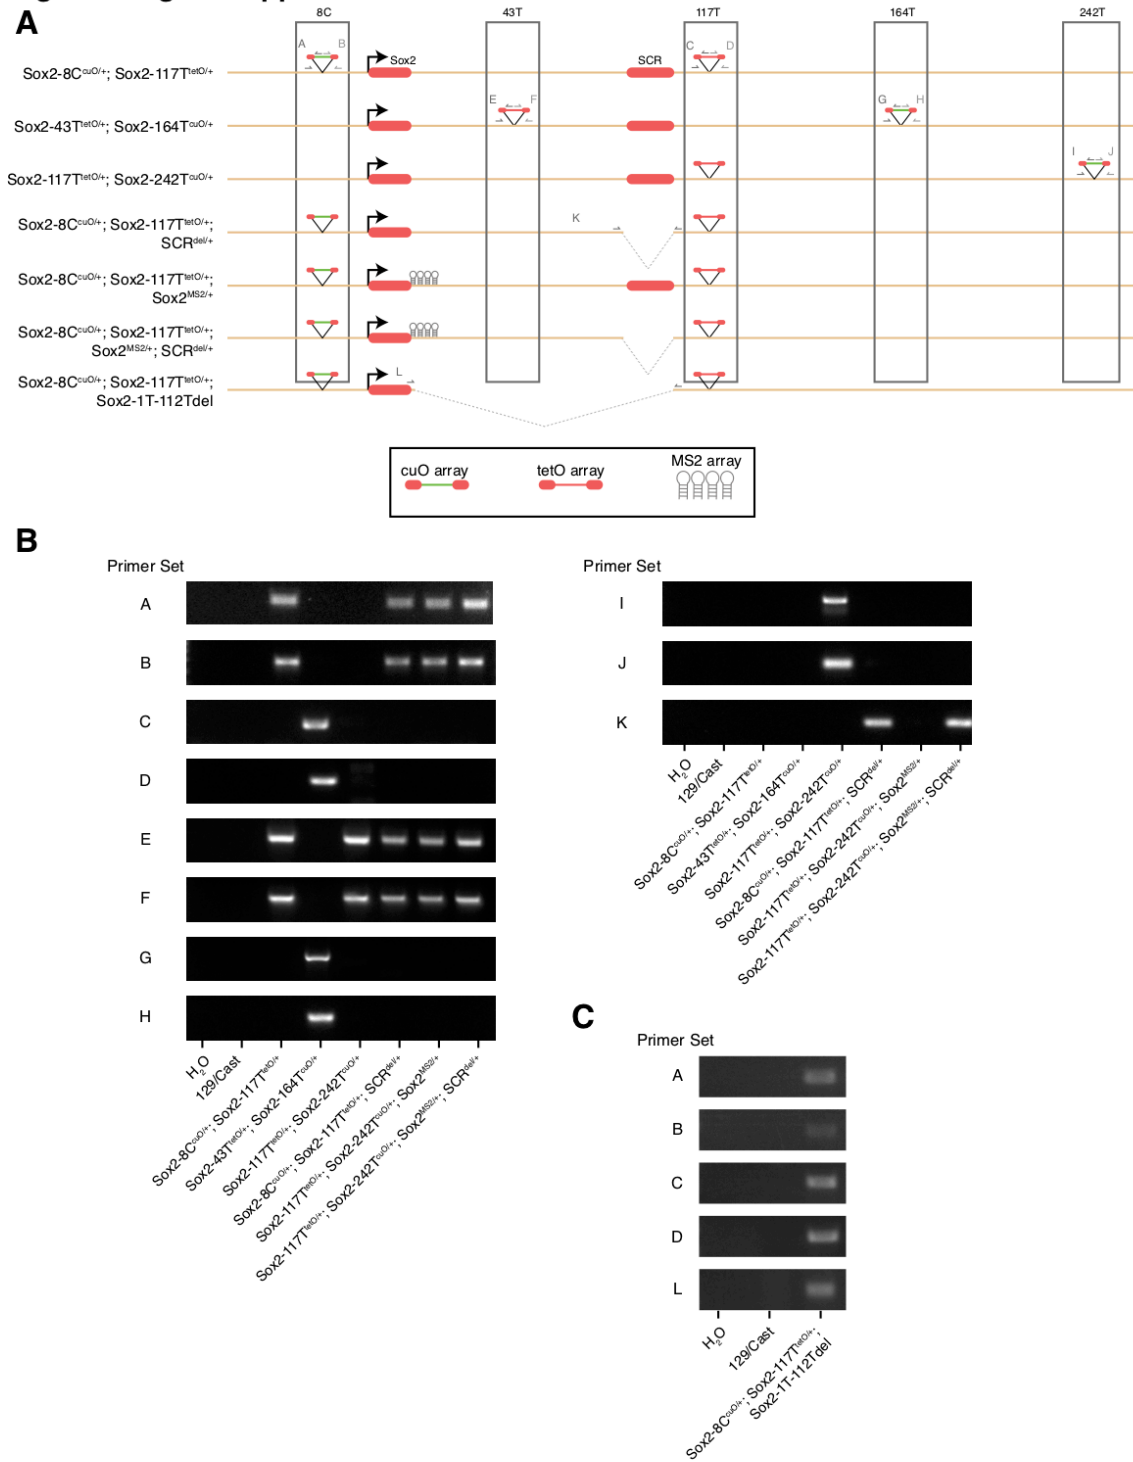

**Figure 1—figure supplement 1. Characterization of Modified Embryonic Stem Cell Lines.** A) Schematic of modified cell lines used in this study. Primer sets used to amplify recombination arms for tetO- and cuO- integration are shown. B,C) PCR genotyping of ESC lines shown in A.

## Figure 1--figure supplement 2

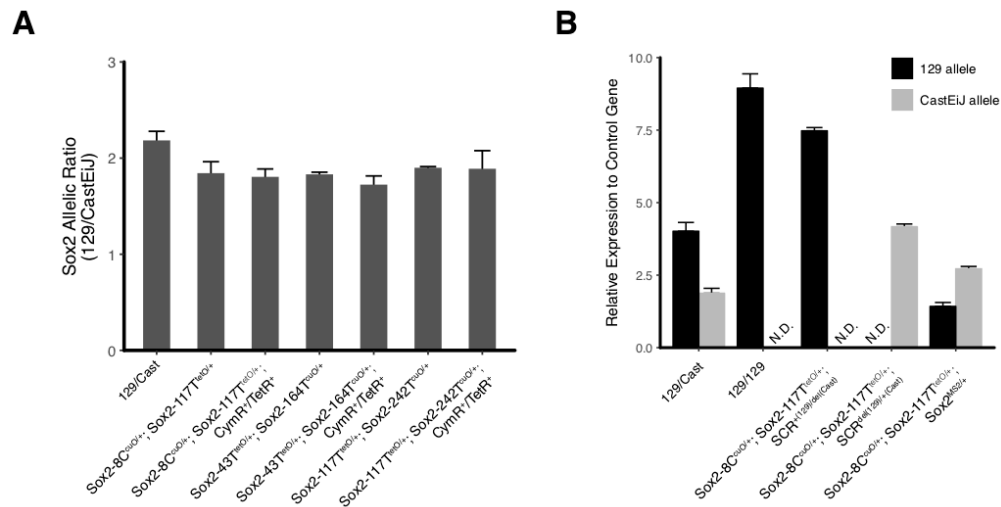

**Figure 1—figure supplement 2. Sox2 Expression Characterization for Modified Embryonic Stem Cell Lines. A)** Ratio of Sox2 expression from the 129 allele and the CastEiJ allele measured by qPCR for modified ESC lines. **B)** Sox2 expression relative to control gene (Tbp) for various cell lines. E14 mESCs, which lack the CastEiJ allele, are included to demonstrate specificity of allele-specific qPCR assay. Deletion of SCR region leads to loss of expression from the Sox2 allele *in cis*. N.D. is not detected.

## Figure 2—figure supplement 1

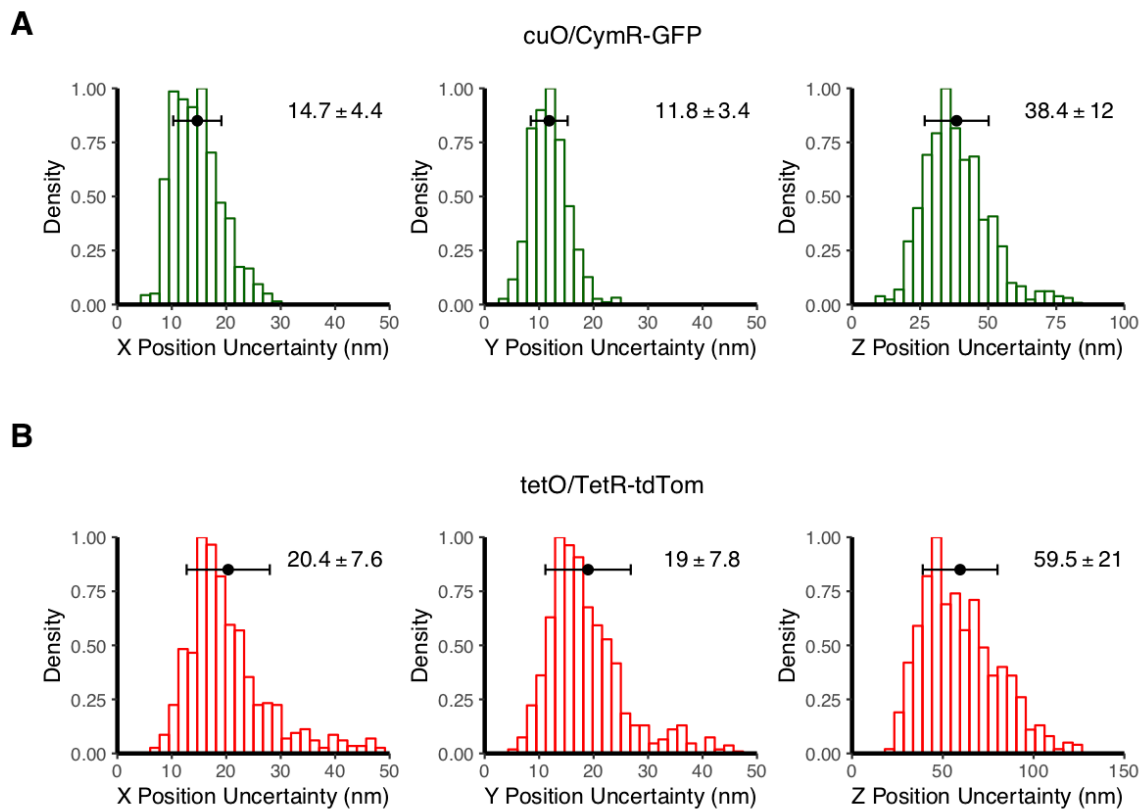

**Figure 2—figure supplement 1. Estimate Localization Precision for cuO and tetO. A-B)** Histograms of X, Y, and Z position uncertainty for fluorescent beads with signal-to-noise ratios comparable to cuO/CymR-GFP (A) or tetO/TetR-tdTom (B). Data plotted are the standard deviation values measured using 10 frame sliding windows collected from 9-10 beads. Error bars show mean and standard deviation of the computed position uncertainties, which are reported in the upper right of each panel.

## Figure 2--figure supplement 2

A

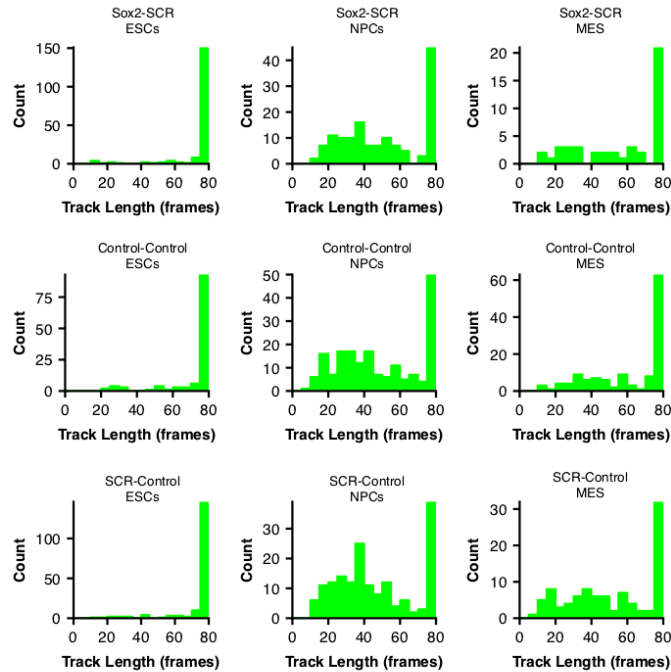

B

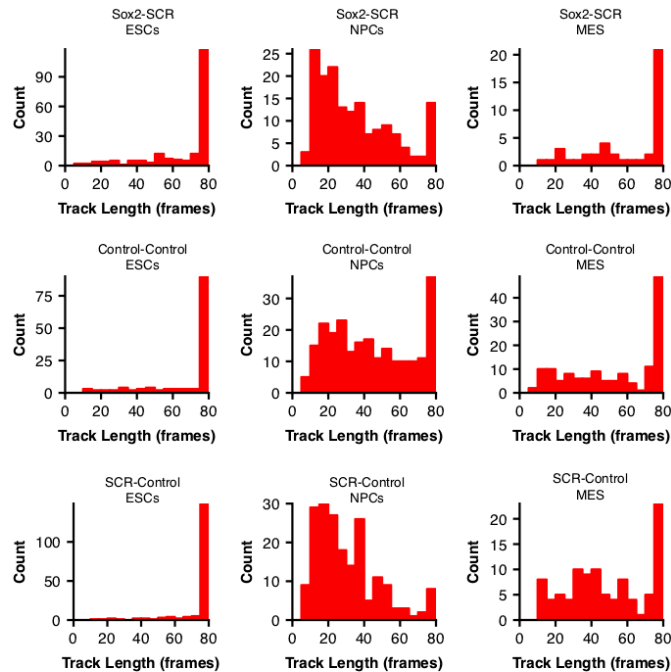

**Figure 2—figure supplement 2. Tracking Lengths for tetO and cuO Spots Across Cell Lines. A-B)** Histograms of the cuO-array (A) or tetO-array (B) Track lengths for cell lines used in the study as ESCs, NPCs, and MES. Tracking lengths were often shorter in NPCs or MES due to increased nuclear movement in these cell types compared to ESCs.

## Figure 3--figure supplement 1

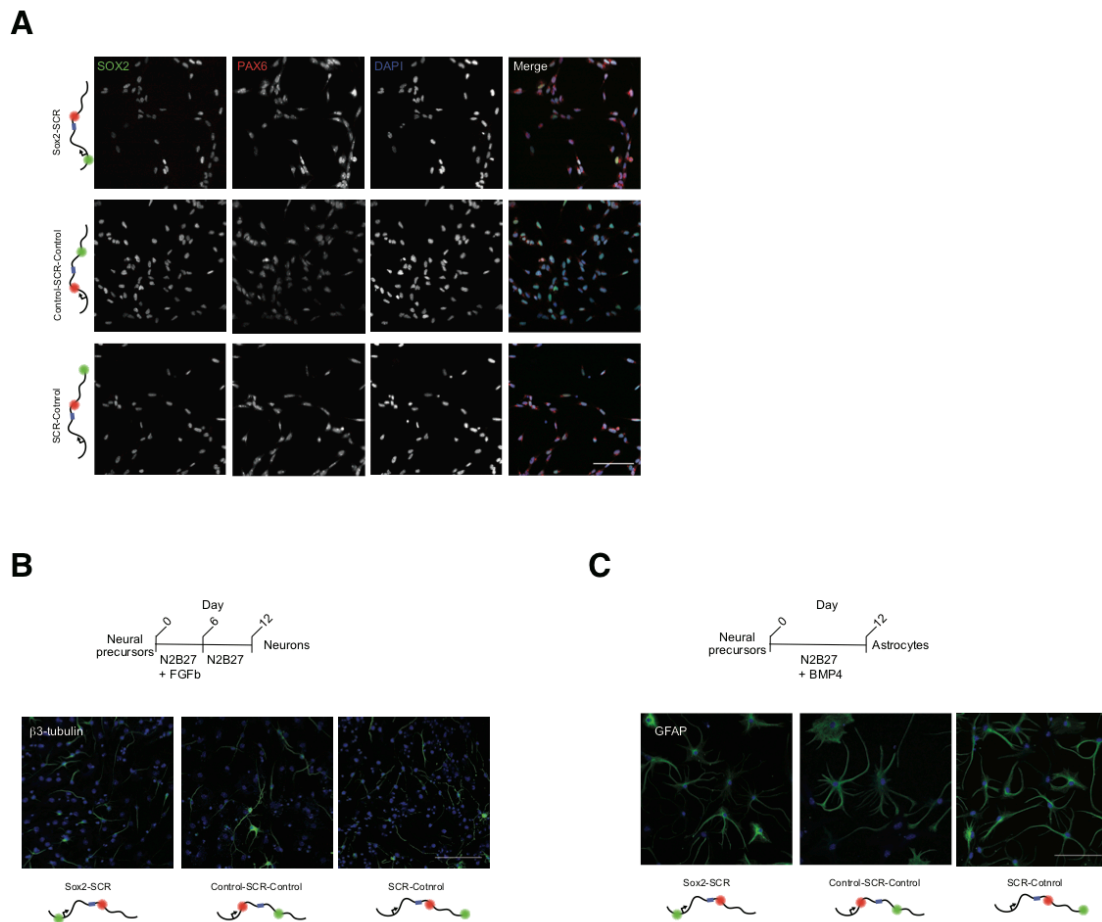

## Figure 3--figure supplement 2

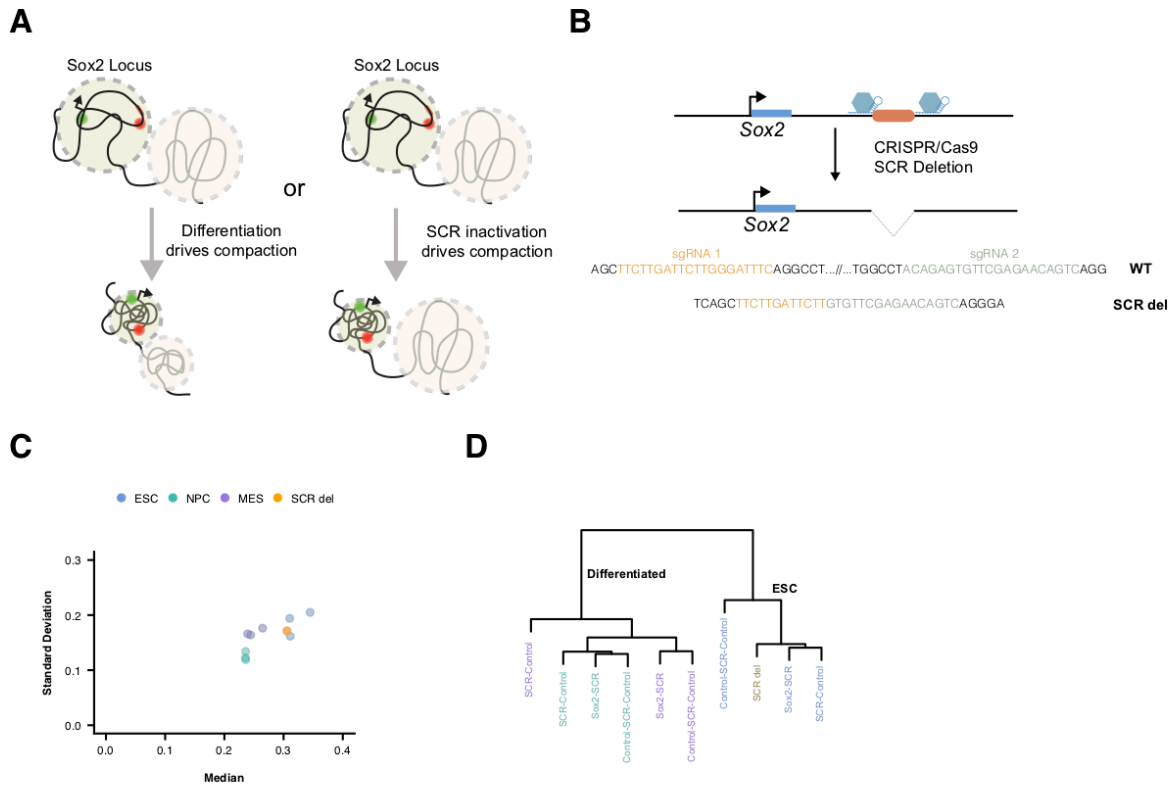

**Figure 3—figure supplement 2. SCR Inactivation Does Not Drive Locus Compaction Upon Differentiation.** **A)** Potential models for Sox2 locus compaction observed upon differentiation to NPCs or MES. At left, cellular differentiation may lead to global changes in chromatin structure that are not dependent of Sox2/SCR activation status. Alternatively, Sox2 and SCR inactivation could lead to changes to chromatin structure within the Sox2 locus, driving locus-specific compaction. **B)** Strategy for CRISPR/Cas9-mediated SCR deletion. Two gRNAs were designed to flank the SCR region and generate a large deletion of SCR. Below, the SCR deletion allele shows a novel junction near the locations of expected Cas9 cuttings, indicating a loss of the intervening SCR sequence. **C)** Scatterplot of mean and standard deviation of 3D distance measurements for each cell line visualizes similarity between Sox2 label pairs across cell types. **D)** Dendrogram visualizing hierarchical clustering of Earth Mover's distances between 3D separation distance histograms of distinct Sox2 label pairs across cell types. SCR-deleted ESCs show greatest similarity to other ESCs as opposed to differentiated cells with inactivation of the SCR element.



## Figure 4—figure supplement 1

**A**

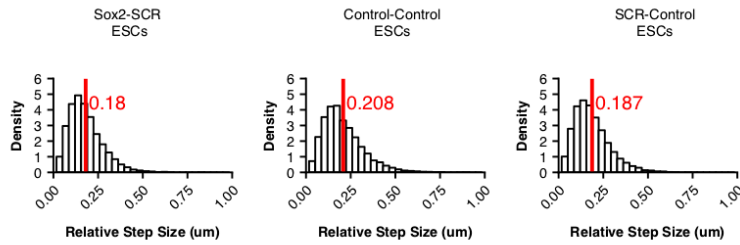

**B**

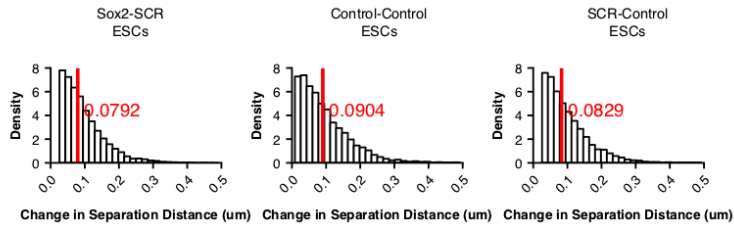

**C**

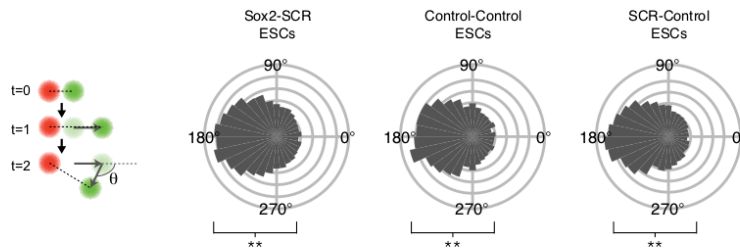

**Figure 4—figure supplement 1. Dynamics Statistics for Each Sox2 Locus Pair in ESCs.** A-B) Normalized histograms of relative step size and change in 3D separation distance for adjacent frames. Mean value is highlighted by a red line. C) Measurement of the XY plane angle made between two successive displacement vectors demonstrates pronounced bias towards a locus “bouncing back” to its position preceding a given step. Statistical test for bias was performed using Kuiper’s Test for Uniformity. \*\* is  $p < 0.01$ .

## Figure 5--figure supplement 1

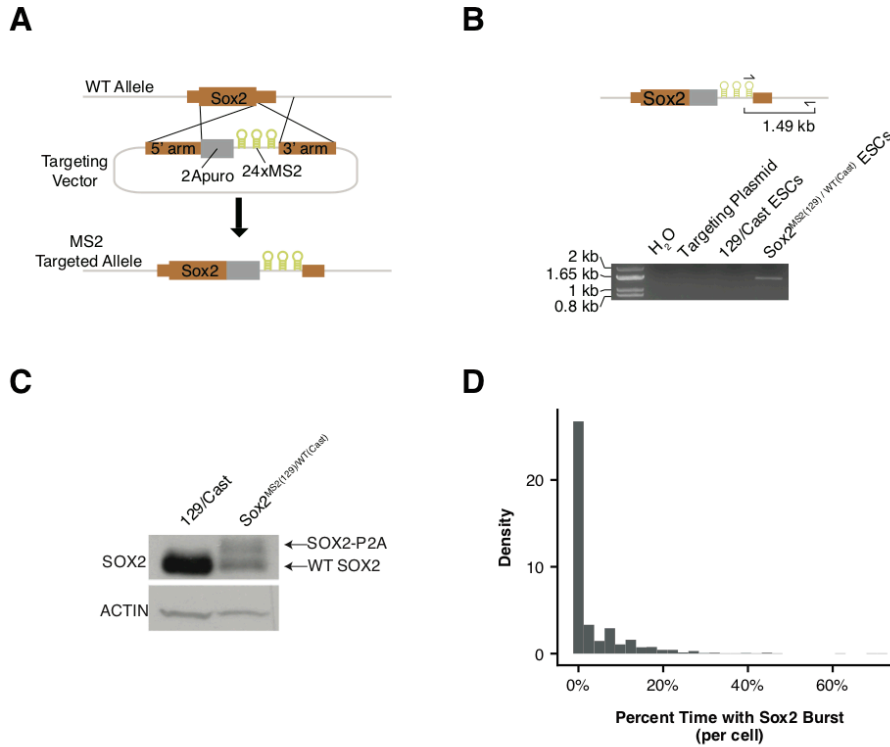

**Figure 5—figure supplement 1. Generation and Characterization of Sox2-MS2 Transcriptional Reporter ESCs. A)** Targeting strategy for *Sox2* transcriptional reporter. A targeting plasmid was used with *Sox2* homology arms and a P2A peptide puromycin resistance gene cassette (2Apuro) inserted in frame with *Sox2*. Downstream of 2A puro is a 24x MS2 stem loop array, which is inserted into the 3' UTR. **B)** PCR genotyping assay to identify a targeted *Sox2* allele. A primer set was used that recognized the MS2 stem loop array and a genomic region downstream of the 3' homology arm. **C)** Western blotting for SOX2 protein in parental 129/CastEiJ ESCs or ESCs heterozygous for the *Sox2*-MS2 allele. Actin was used as a loading control. **D)** Normalized histogram of the percentage of time individual cells have a detectable *Sox2* transcriptional burst.
